# Supplementary material for: Solid-phase synthesis of lithium metaniobate
Source: PLOS journal article supplement (doi:10.1371/journal.pone.0007526), 1986-09-20

Figure S2

a) b3677 *pepN*, Aminopeptidase N

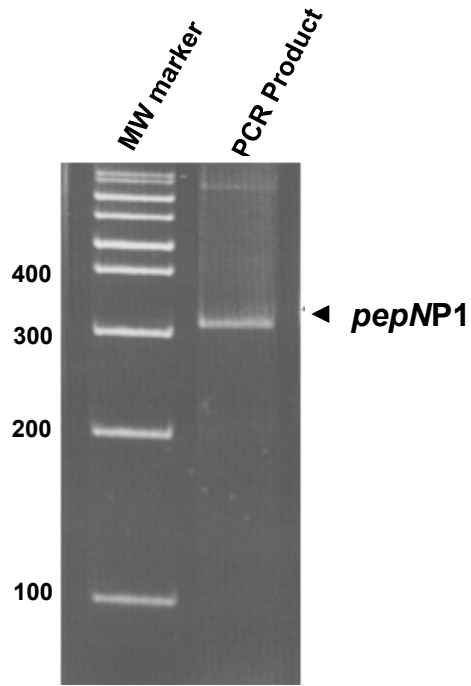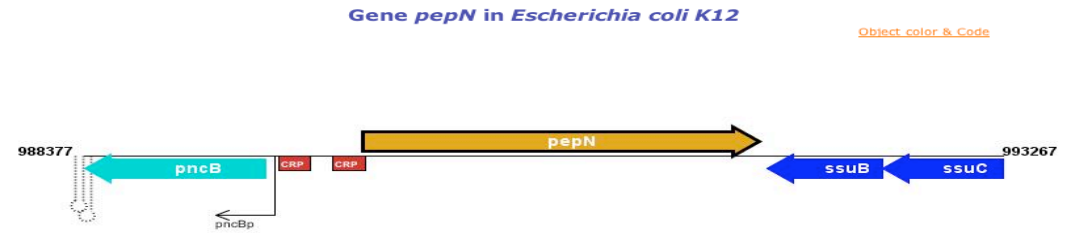

The TSS of the *pepN* gene has not been reported.

*pepNP1*

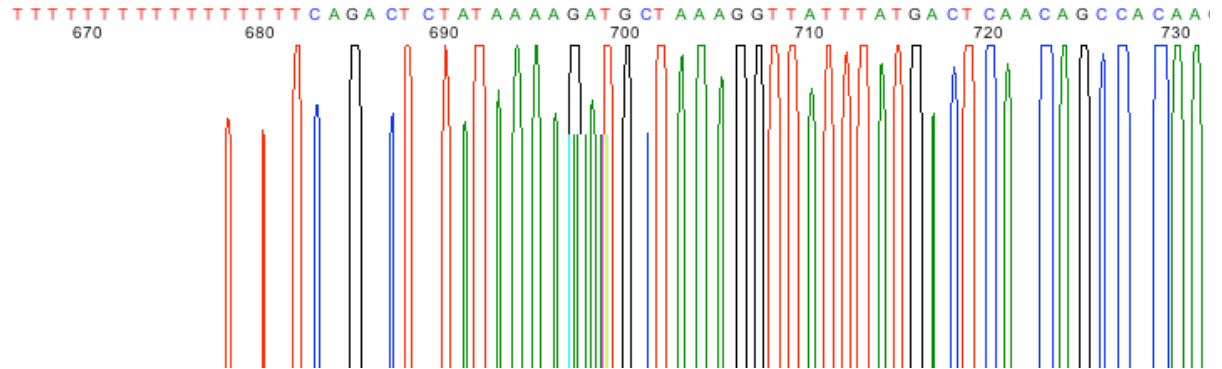

Sequence of the PCR product

|             |                                                                  |                                                                                 |                                              |              |
|-------------|------------------------------------------------------------------|---------------------------------------------------------------------------------|----------------------------------------------|--------------|
| Seq-PCR     | -----                                                            | TTTTTTTTTTTTTTTTTTTTTTT                                                         | CAGACTCTATAAAAAGATGCTAAAGGTTATTTATGACTCAACAC | -----        |
| Genomic_seq |                                                                  | TAGCGCGATTTACGCAACAGGAATAGACTGAACACCAGACTCTATAAAAAGATGCTAAAGGTTATTTATGACTCAACAC |                                              |              |
| pepN_ORF    |                                                                  | -----                                                                           | -----                                        | ATGACTCAACAC |
| ruler       | ...440.....450.....460.....470.....480.....490.....500.....510.. |                                                                                 |                                              |              |

Start codon

Figure S2a

b) b1342 *ydaN*, predicted Zn(II) transporter

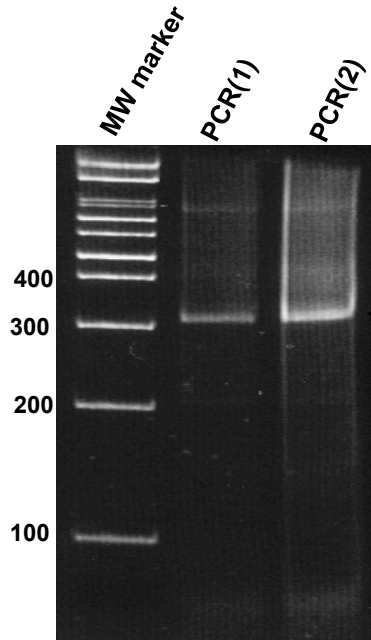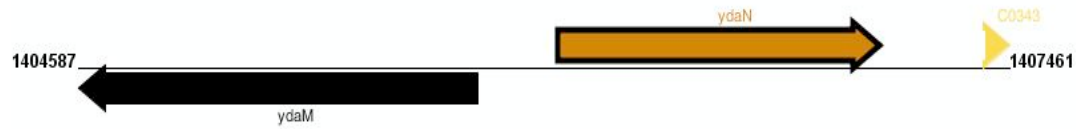

The TSS of the *ydaN* gene has not been reported

*ydaNP1*

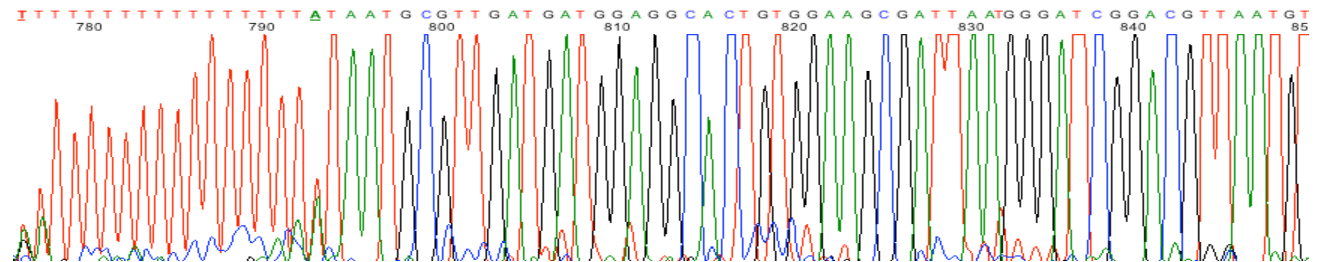

Two independent experiments produced the same results.

Sequence of PCR(1)

|                  |       |                                                                    |                                |               |                   |
|------------------|-------|--------------------------------------------------------------------|--------------------------------|---------------|-------------------|
| Seq-PCR_1        | ----- | TTTTTTTTTTTTTTTTTTT                                                | AATGCGTTGATGATGGAGGCAC         | TGTGGAAGCGATT | AAGGGATCGGACGTTAA |
| Genomic-seq      | ----- | CCGTAACAGGGCCAGAAGGCTAGACT                                         | TACAAAATAATGCGTTGATGATGGAGGCAC | TGTGGAAGCGATT | AAGGGATCGGACGTTAA |
| Seq-PCR_2        | ----- | TTTTTTTTTTTTTTTTTTT                                                | AATGCGTTGATGATGGAGGCAC         | TGTGGAAGCGATT | AAGGGATCGGACGTTAA |
| <i>ydaN</i> -ORF | ----- |                                                                    |                                | GTGGAAGCGATT  | AAGGGATCGGACGTTAA |
| ruler            | ...   | 450.....460.....470.....480.....490.....500.....510.....520.....53 |                                |               |                   |

Start codon

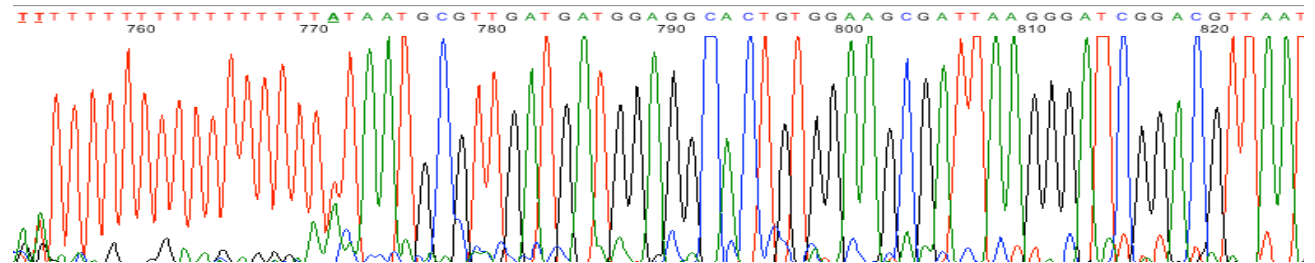

Sequence of PCR(2)

c) b3300 *gdhA* Glutamate dehydrogenase

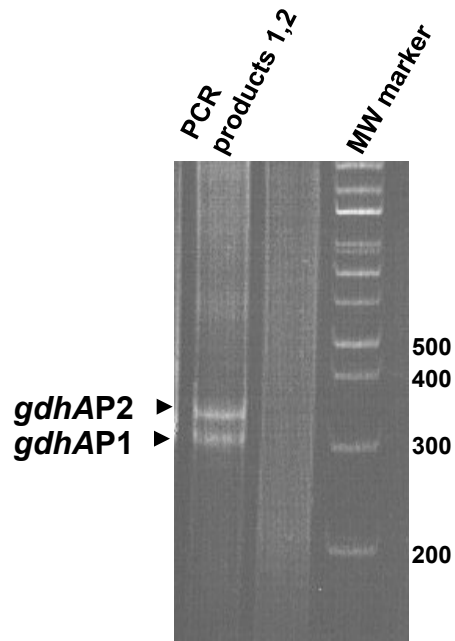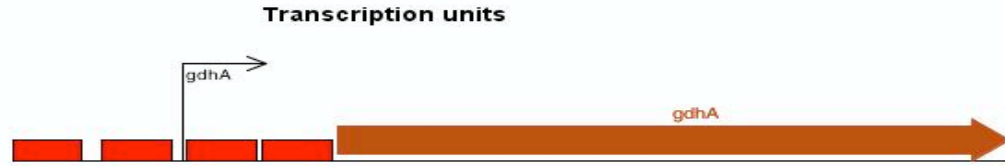

The TSS of the *gdhA* gene is identical to the previously reported.

|               |                                                                   |
|---------------|-------------------------------------------------------------------|
| Name:         | <i>gdhA</i>                                                       |
| +1:           | 1840331                                                           |
| Sigma Factor: | Sigma70                                                           |
| Sequence:     | gctttcctgggtcatttttctgctaccgctcacattctgatggtatagtcgaaaacTgcaaaagc |
| Reference(s): | [1] Riba L., 1988                                                 |

*gdhAP2*

*gdhAP1*

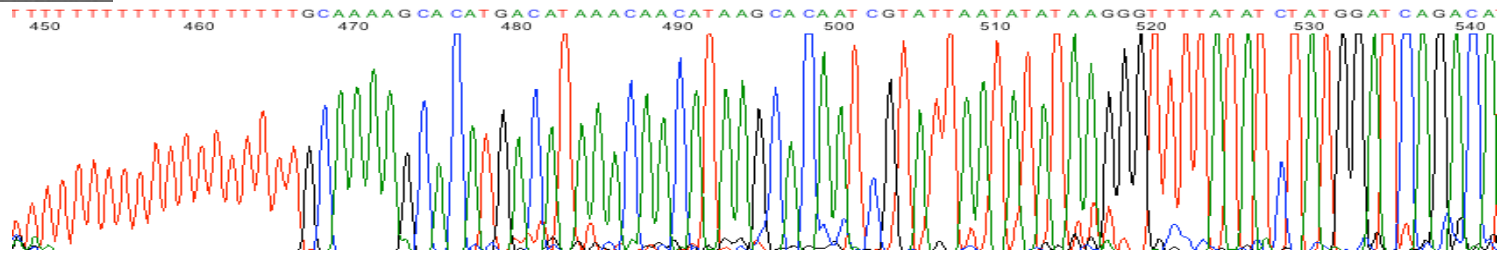

PCR 2 ----- TTTTTTTTTTTTTTTTGCAAAAGCACATGACATAAACCAACATAAGCACAAATCGTATTAATATAAAGGGTTTTATAATCTATGGATCAGACATA

Genomic\_seq CACATTCCTTGATGGTATAGTCGAAAACGCAAAGCACATGACATAAACCAACATAAGCACAAATCGTATTAATATAAAGGGTTTTATAATCTATGGATCAGACATA

gdhA-ORF ----- ATGGATCAGACATA

PCR 1 ----- TTTTTTTTTTTTTTTTGGTTTTATAATCTATGGATCAGACATA

ruler 0.....420.....430.....440.....450.....460.....470.....480.....490.....500.....510....

*gdhAP1*

Start codon

Sequence of PCR product 1

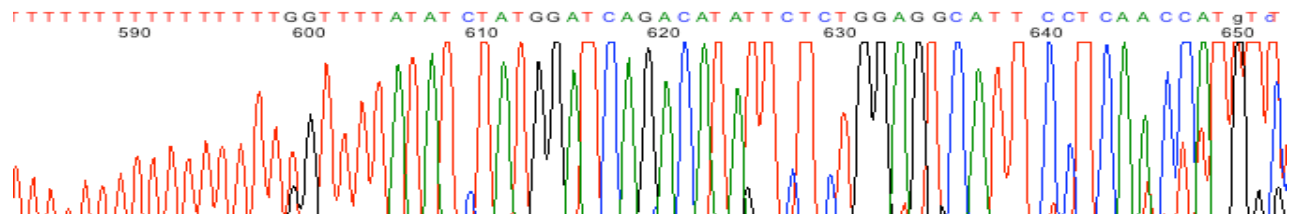

Supplement: S2 (10.1371/journal.pone.0007526.s002) [file journal.pone.0007526.s002]
