# Supplementary material for: Solid-phase synthesis of lithium metaniobate
Source: PLOS journal article supplement (doi:10.1371/journal.pone.0007526), 1986-09-20

Figure S1

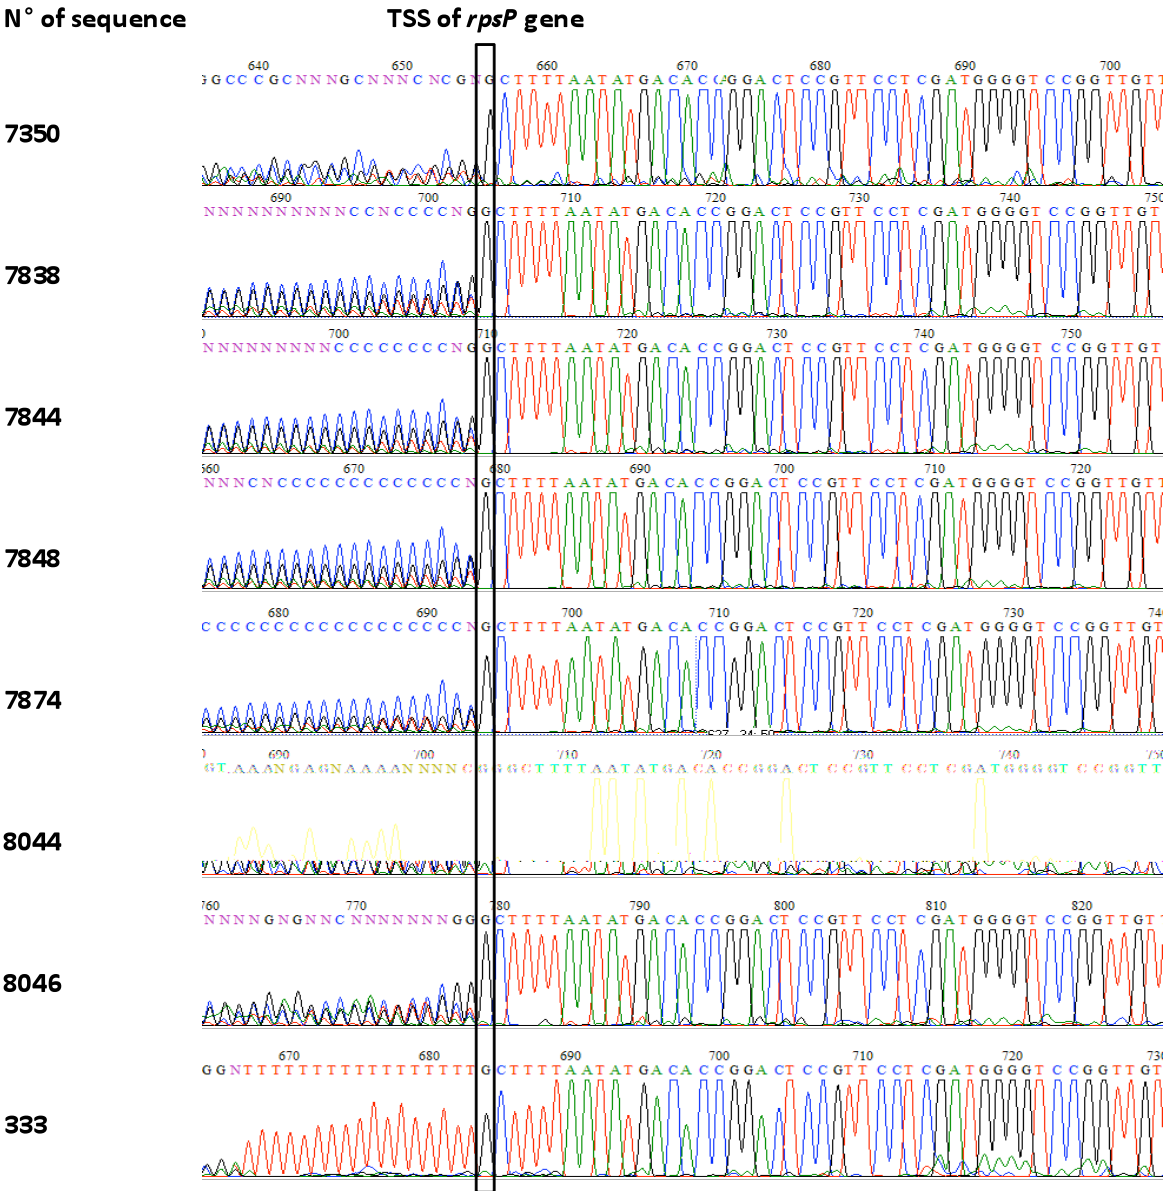

Supplement: S1 (10.1371/journal.pone.0007526.s001) [file journal.pone.0007526.s001]
