# Supplementary material for: Genome-Wide Identification of Transcription Start Sites, Promoters and Transcription Factor Binding Sites in E. coli
Source: PLoS One. 2009 Oct 19;4(10):e7526. doi: 10.1371/journal.pone.0007526 (PMC2760140; doi:10.1371/journal.pone.0007526)
Supplement: Table S2 — Oligonucleotides utilized for DMTSS. (0.22 MB XLS) [file pone.0007526.s008.xls]

## Sheet: Sheet1
Table S2. Oligonucleotides utilized for DMTSS.
Robustness of DMTSS
oligonucleotide controls
ID	bname	name	Oligonucleotide
3185	b0008	talB	GTACTGACGAAGGGAGGTCA
3186	b0008	talB	ATGAGAGAAGGGTTGGTTGT
3187	b0929	ompF	GCAGTACCTGCTACTAACAG
3188	b0929	ompF	TTCACCGTTACCCTTGGAAA
3189	b4245	pyrB	GGTCATCGCGACTAAGGTCG
3190	b4245	pyrB	GTACGGGTAGAGGCTTCGAA
3191	b0023	rpsT	GCGTTGTGCTTACGAGCCTT
3192	b0023	rpsT	ACGATCGGTTGCATTTCGTT
3193	b0957	ompA	CCACTGCAATCGCGATAGCT
3194	b0957	ompA	TGAAACCAGTGTCATGGTAC
3195	b4314	fimA	TGTAGAACTGAGGGACAGAG
3196	b4314	fimA	AAGCGGCGTTAACAACTTCC
3197	b0126	yadF	GCATTGTTGCTGATGAGTGT
3198	b0126	yadF	GACTGTCGGAACATCCAATC
3199	b1237	hns	CTCTTGCCTGCGCACGAAGA
3200	b1237	hns	GCAGTTTACGAGTGCGCTCT
3201	b0169	rpsB	GTCGCGCATGGAAACAGTTG
3202	b0169	rpsB	CGGCTTCATTTTCGGGTTCC
3203	b1073	flgB	ACGTAAGGCGGCGTCGAGCT
3204	b1073	flgB	TGATAACCAGGGGTATCGGC
3205	b2414	cysK	CGATAGTCAGCGAGTTATCT
3206	b2414	cysK	GAAGCTGGGGTTACGAGATT
3207	b3180	yhbY	AGAACAACTGGCTTGAGCGG
3208	b3180	yhbY	CCTTGATGAGTTCATGGTGC
3209	b2609	rpsP	TAGCGCCGTGACGTGCTAAA
3210	b2609	rpsP	TCGCTAGCGATTGGGTTGAA
3211	b3936	rpmE	GCAAGAGCAGCTAGCAGTAA
3212	b3936	rpmE	GTGAAGAACGGGTGGCACTT
3213	b3298	rpsM	GCGATTACGGCATGCTTATG
3214	b3298	rpsM	TGTCCTTCAGACAGCTCACT
3215	b4200	rpsF	TCGCTCTGGTCAGGATGGAC
3216	b4200	rpsF	CTTCCAGACGGTGGATCTTG
3217	b4000	hupA	CCTGGGTTTTGGACAGTTCT
3218	b4000	hupA	GAAACCAACCAGTTGTACAG
Oligonucleotide used LB 30 C, O.D. 0.8 MG1655, Bernstein, J. et al 2002
ID	bname	name	Oligonucleotide
501	b0085	murE	TCCGCCTGATGACCTACTAC
524	b0127	yadG	CTGCGGCACCAGTCCCAACT
493	b0168	map	AGCTCGCCGGTGCTGACGCC
293	b0196	rcsF	TAAATTCGGACCGGCGTGGC
892	b0209	yafD	TGTTCCACACCAGGATCCGA
304	b0212	gloB	CCAACGTGATCGTGGTGATG
522	b0219	yafV	CCCGGCTCAACCAGCAAAAA
498	b0223	yafJ	TCGGGTAGTCCTGGACAAGT
1889	b0240	crl	AACTCACGCAGGGTGTGCTC
1422	b0253	ykfA	AGACTGCTCTTCCCAACACC
3215	b0329	yahO	CAACACATCAGCCCCTTTTT
3216	b0329	yahO	TTTCAAATTCCGCTTTGGTC
3217	b0333	prpC	GATGCGCCACTTCTTCAAAT
3218	b0333	prpC	GCCAGAAAGTGCCACAGATT
383	b0365	tauA	TTTCGCCGGTTCGGCTGAGG
367	b0376	ampH	GAGCCATCCCCGTGGCACCG
1223	b0386	proC	ATCCGGGGAGGGGGTGTATA
503	b0393	yaiD	TCCCATCGGAGGAACCCAGC
357	b0401	brnQ	ACGGCAGTAATGAGGAAGCC
491	b0426	yajQ	GGCGTCGTTCAGCTCAAATG
910	b0427	yajR	GTACGTGGTCAGAACCGGCA
295	b0439	lon	CGCTTCCAGACAACGGATAG
350	b0452	tesB	GGGACGGTCTCTTTTGCAGC
520	b0458	ylaC	AGACAGAGCCTGACAGCGTT
379	b0464	acrR	CTGCTTTTGCAATCTCGCCC
1230	b0465	kefA	GTCGGCAGATCACCATTCGA
563	b0484	copA	ACGGGATTGATGACTCCGCC
355	b0505	ybbT	CCAAATCGTGGTAACGCTCC
929	b0512	ybbX	CCTTCCCAGTGGCTACGACC
291	b0525	ppiB	GCGGCGGTTTTGAACCGGGC
930	b0573	cusF	AAAGCGCATGGTCATCTCCG
1218	b0577	ybdG	CCCCTGCAGGGTAAAAGCTA
1231	b0579	ybdF	ATAAAGGGGACGCCGCGTAG
300	b0597	ybdB	GAACGGCTGATGAGTACGGG
931	b0610	rnk	CACATTTGGGCGCGATCCAA
1885	b0624	crcB	GAAGGTTGTTAGACCGCCAC
922	b0625	ybeH	TTCTCGCCGTAAAGTCCGAG
528	b0628	lipA	TAGGGCAGGAGGCTTCCTCG
497	b0637	ybeB	ACGACAATCCAGTCGGCGCT
564	b0660	ybeZ	AGGTGGATCTGTTCCGGTTC
2825	b0733	cydA	TGTGGCTACCGGTCTGACCA
1115	b0752	ybgR	AATTGCACGGCGAGTAGGGC
504	b0772	ybhC	AGAAGAGGTACCAGGCGCGG
360	b0801	ybiC	AGGAGCGTACATAGCTTGGG
888	b0825	mipB	CCCAAGCATTATCGCCGCGG
505	b0835	yliG	CTCGGTACCACGTCATAACC
3223	b0836	yliH	ATACTGCGGCTGTCGCTAAT
3224	b0836	yliH	CTTTTGCCTTCCTCAGTTGC
949	b0840	deoR	GGTTGTTCAGATCGCGACGA
1418	b0849	grxA	TTAGTGATCCCTTCCGCACG
374	b0865	ybjP	GGGCCTCCTTCAACGCAAGG
525	b0891	lolA	GTAGCTTGCTCAACGAACGG
286	b0893	serS	TCGATATCTTCCCCGCGCGC
495	b0910	cmk	CGCGATAAATTGCACCCGAG
517	b0925	ycbB	CGCGTGCGGCATACAACAGT
1446	b0953	rmf	GCCATTACTACCCTGTCCGC
359	b0956	ycbG	GCAACACATCGACGGCTTCC
535	b1002	agp	ACGGCGGCGGGCATTCCCCC
302	b1005	ycdF	CCATTACTGACCTCCGTCTG
507	b1015	putP	CGAATGGCCCAAGACTACGA
1115	b1018	ycdO	GCCTTTGAGGATCTCCCACT
1444	b1044	ymdA	GACTGGGTGCTGACGTCACA
1232	b1046	ymdC	CCAGAGGAAAAAGGCCACAC
516	b1055	yceA	GCCGGGTCGAAGGCATAGAG
370	b1059	solA	TCGCGTATCGCCGTGGTGGC
1222	b1060	yceP	GCTCGGACTTATTTGGGGTC
532	b1063	yceB	AAACACGGGCAGCGCTTTCA
294	b1089	rpmF	GATGTGGTGACGCAGGTGTT
288	b1101	ptsG	AAAGCCGAGGGCGACACCGA
358	b1127	pepT	GGGATATCGCCAGGGACGTT
889	b1144	ymfJ	GCAGAGGGGTGAGTGTGTTA
506	b1162	ycgE	TCAAAGAGTCGGTGTCCGCC
381	b1179	ycgL	TGACCAGTTTCTTCCGCCCA
3219	b1182	hlyE	GGCTGCCTGTGAATACTCCT
3220	b1182	hlyE	TAATGCTCCATCTGCGGTTT
3229	b1188	ycgB	CGTGCTTATACAGCCGTTCA
3230	b1188	ycgB	CTTCAATCTGGTGCGGGTAG
3221	b1197	treA	GTTAACGAAATGGCGCAGAT
3222	b1197	treA	TTTGGTCCGGAAAAAGTTTG
3233	b1205	ychH	CACCATGTGCGAAATACTGG
3234	b1205	ychH	CCATTACCACCAGACCCAAC
2827	b1210	hemA	GCCTCTACTGGCATCAGGAT
437	b1233	ychJ	CAAGAGGGATGCCAGGTCTT
492	b1259	gshA	GGATGACCTGTTGTTGCCAG
365	b1266	yciV	TCAACGCCAGTCCCGAACGT
1866	b1269	yciL	TCAAACACCGTTGGACGTCC
363	b1294	sapA	ACTTGCCCGCTGACGCAATA
911	b1298	ycjL	CATGTGGTAGCGCAATAGGC
943	b1309	ycjM	CGTTTCGCACTCTCAAGACG
526	b1325	ycjG	CGTGTCAGCCCTTTCTCTAG
496	b1340	ydaL	GCGGCTGACTTAGTGGGATG
893	b1342	ydaN	TGTCGCCAGCCATTGGGCG
924	b1355	ydaG	GTATAGCGACTTCTGCCTGC
3227	b1384	feaR	CGCTCATCCTGCTCCATTAT
3228	b1384	feaR	GCTGGTTGTCACGGTACTCA
927	b1385	feaB	AAGGCCCGCCAGGCAGACAT
1233	b1408	ynbA	AAAGAGGATGGGTTGTGCCG
559	b1414	ydcF	CTGTGCGATGGCGCTATACA
3231	b1415	aldA	ATCTTGCCCCCTTCTTCAAC
3232	b1415	aldA	CACATCAATCCATGCGTCTC
384	b1439	ydcR	CGAGCAACTGATAGGCATGG
1448	b1454	yncG	TCGCGTGAAGCTCCCTCGTG
351	b1511	ydeV	CTCACACGCCAGTTGCCAGT
1121	b1526	yneJ	CCGGCAGGAGAGAGACGTAA
932	b1533	ydeD	TGTAACACCAGCGAAGCCAG
1882	b1537	ydeJ	ATTGCTGGCTTACGCTGAGG
353	b1540	ydfH	GAACCGGCTGGCGTGACACA
371	b1550	ydfY	CCCGTCATTTTTTCCCGTGC
894	b1552	cspI	GGCAGGACCTTTAGGTCCGT
1426	b1593	ynfK	TCGGGTGTCTCTTTGCTCCC
1884	b1597	asr	CGGTTGCTGATGGCTGTGTT
948	b1598	ydgD	ACGGTGATTGGGTCGTGTCA
1219	b1601	ydgG	CGCGGAACCCAGATAAGCTA
434	b1614	ydgA	CGCCTGCGCGACCATGTCTT
1863	b1641	slyB	CCCAGGAAACCACCAAGAAC
1423	b1647	ydhF	AGGTGAGGTGCCAGTTTCAG
1887	b1661	cfa	GGAGTTGGTTCTCGAGACCT
891	b1678	ynhG	CCCCTTCTTGCACCGTATAC
1221	b1695	ydiO	TCACGCGGATATGTCCCGTT
303	b1726	yniB	TCCTTGTTTTCCTGCCGGGT
2025	b1727	yniC	ACTTCCTGACGGCTTGGCCC
1443	b1741	ydjQ	TAGAGCGGCATGGTGTCACT
3235	b1748	astC	GCCGGTATGCCAGAACTTAC
3236	b1748	astC	CACCCGCGAAGTCGATATAC
919	b1788	b1788	CTAGCCGGTCCGTTCGATAA
1113	b1789	yeaL	TCCCGATACTTAGCCCCTGT
895	b1825	yebO	GTTAGTCCGTGAACTGGCAC
920	b1832	yebR	GCTTGAGGACGATACACTGG
1447	b1843	yobB	AGCGGGTCTAACAGTGAGAG
380	b1845	ptrB	TTGTGAGGCCATCACCCGAT
562	b1853	yebK	GCCATTCGCCAGACTCTGTG
290	b1866	aspS	TCCGCACGATCCGGATCGAA
1420	b1875	yecM	TTCAAACCCGCGACGCCAGC
385	b1956	yedQ	TAGGCATCTTCCAGCACCAC
1868	b1958	yedI	AGAGGCGTAATCGCCCACGG
945	b1959	yedA	CAGCCAGCAATAACAGGCCA
364	b2000	agn	CGTGACTGCGGCAAGAGACA
305	b2036	glf	TCACAGTCCTCTGTGTACGC
494	b2042	galF	ACGCGTGAGTTACCAGGAGG
382	b2063	yegH	GGTTATCAATGCCGAGGACC
2026	b2086	yegS	GTATGTCATCCCCCTCACAC
2823	b2096	gatY	TCATGACTGAGCGCACGCCA
435	b2114	metG	TTCGCTGGTAACGGACCCAG
1449	b2141	yohJ	CGAATCAGTACGTAGCACCC
1424	b2176	rtn	TGGAGCCGGTCAGTAGTGGA
923	b2183	rsuA	ACGTGGACCGTGTTGCTGCG
372	b2224	atoB	CCCAGCCCGGCTTGTAACAC
301	b2249	yfaY	CCCACCGTATTGCGGCGAGA
2030	b2258	b2258	CCCACATCAGGCCCATTACA
2032	b2301	yfcF	TCTGTCGTGCACGCGCACGA
907	b2305	yfcI	CCCTCCTGCGTTTTCACAGA
307	b2330	yfcB	GCTACGAGTCGGGTAAACTG
375	b2346	vacJ	AGGCGACAGCGACCGGTCGA
928	b2375	yfdX	CGCGCTACCTGCACGTCACG
942	b2379	yfdZ	GTGGAGTAACCATGCGTGTC
1445	b2389	yfeO	GGTGAATCCTGGGCTATCCC
352	b2418	pdxK	GTTTGATAGCAGGCACGGCA
349	b2432	yfeY	CTTGCAGTGGTGTGGACGCC
1217	b2435	amiA	CTTTCGGCTTGCTGTGTCCG
533	b2441	eutB	CGGATGTCCGCTACGGTCAT
348	b2494	yfgC	TCCTGCGGAGGTTCCCATAT
354	b2517	yfgB	GCCGCGCAACACTTTGTTGA
2828	b2526	hscA	CGAGCGCTGCATTAGTACGC
436	b2535	csiE	TAGCGCAGGATCTCCCGTCC
2822	b2551	glyA	CGGAGTGCGGCTGGACGTTA
499	b2610	ffh	GTCCGCCTCCAGCAGCGCCA
2029	b2630	yfjN	GAACGATTGGCTCCAGTGAG
527	b2682	ygaZ	GACGGGCCATACAACACATG
1886	b2701	mltB	CCGAATCCAGACGCTTCGCC
373	b2735	ygbI	CCTCCGGACACCAGCACAAC
287	b2780	pyrG	GGCTCATAGTACCTGGATCG
361	b2794	yqcD	TCCGTACCGTGAAAAGGCAG
917	b2853	ygeI	GGCGCCATCCATGTTGAAAC
1215	b2869	ygeV	AAGGGGATCGAAGCGAGACT
912	b2876	yqeC	GGGGATGTAAGAGACGCATG
913	b2894	xerD	GTCAACCCGCGGTGATGCAA
521	b2901	bglA	GCGTCCAGGCAATGGATGTA
356	b2902	ygfF	AGCACGAATGCTTTGCCACC
1216	b2923	yggA	GCGCTGCCACCAAAAATCCC
1114	b2997	hybO	GGTTAGTAACCGATTCGGCC
518	b3009	yghB	GCGGTCAGAATCGCAATCGT
916	b3018	plsC	ACATATGCCCAAAGGTGGCC
925	b3020	ygiS	GGGTCGAGCGTACCTGGGTC
557	b3034	yqiE	GTAGCCAAGGGGTTTCGCTG
292	b3037	ygiB	GGCAACCGCGAGAGCGACTG
1234	b3071	yqjI	CGACCACCGCAGCATTGACC
944	b3075	ebgR	TACGGGCACTACTGGTCTTG
2031	b3087	ygjR	ATGCAGGGAATTCGGGCTGG
1425	b3128	garD	GACTTTATGCCCCTGGGGAA
946	b3190	yrbA	GACCATAGACCGTCTGCTGT
377	b3210	arcB	TAGAAAGTAGACCGCCCACG
950	b3215	yhcA	CACGAATAACGGGCTGAGTC
366	b3234	degQ	GCCGTTCCTTCCACCCGTAC
1229	b3267	yhdV	CCAGTTATCCTGAGTCGTGC
921	b3346	yheO	TGGGAGCCAATAAGCATCGC
908	b3351	yheR	CCTCCCGGCCCGCTGGCAAA
1880	b3364	yhfC	CTGCGTTTTCAACGGGACGA
558	b3498	prlC	CCCTACCCAGGTGCTGTATT
378	b3499	yhiR	GGCATGTTCGCTGCCTAACT
914	b3500	gorA	ACCATAATCCGGGCCGTACA
308	b3504	yhiS	CCCAATTATCGCAAGGCCAC
1235	b3511	hdeE	TAGGCGACTGCGACGAGGAA
2824	b3528	dctA	AGGCTGCACGACGTTAACGA
890	b3548	yhjY	CTATCCCAGGTGTAACGCTC
1888	b3549	tag	GCGTCCTGTACCAGTCTTTC
915	b3572	avtA	GCGTCTGGAAGTAGTCCTGC
500	b3609	secB	GAGGCCGTTACGGTAACACG
1864	b3655	yicH	ACTTTTGGCCACCAGGGTCG
1881	b3680	yidL	ACACCGCAACCCATGAGTTG
519	b3742	mioC	GGACTGCAGAAAGATCGGGC
1236	b3746	yieN	ATTTTAAGCGCCGGGCGATC
376	b3747	kup	CCAAAACCAAACTGGCCGGA
941	b3753	rbsR	TGAGGCTACGCGCCAGAGCT
2033	b3764	yifE	TTACCGCCGGAAAGGGTGTG
1870	b3775	ppiC	GGCCGGTCGGCTCCAGTACC
386	b3779	gppA	CTATTCAGGCCAGCAGCCAG
897	b3795	yifK	GAGCCCTGGATTGTGATTCC
1867	b3809	dapF	GTTGGCGGTGCTGACGCGGA
530	b3821	pldA	GCGGAAATGCCAGGCTCAAC
1869	b3847	pepQ	AGGTCGGCAGCGGTTCGACG
2027	b3859	yihE	CTGACCGTTAAAGGCCACAG
947	b3925	glpX	GAGCATCGGTGCTTCGTCGA
369	b3930	menA	GATCTGTAATAGCCCGGCGG
1122	b3933	ftsN	GCGTCTCGGACTCTTCTTTC
1119	b3953	frwD	GCCCGGCGGATATCCTCATC
918	b3954	yijO	CGGGAACTAACGTTGCTCCA
2028	b3963	yijC	CGCGCCTGGCGCATGAGTTG
1220	b4020	yjbB	CGACGCTCCGGCTAAGGACA
561	b4051	qor	TAGACTACACGATCGCCTGC
306	b4052	dnaB	CCCAGCGTTCGTTATCTAGC
362	b4053	alr	GCGTTCGCGCGGTCTCAAGA
1120	b4077	gltP	TCACCCGCCGGAGAGAGCAA
560	b4138	dcuA	GTATTTCGGGTTACGGCGCA
529	b4149	blc	CCCTTCACTCTGCTGCCACA
909	b4157	yjeN	GGGTGTTAATGGTGCTACCC
1883	b4166	yjeS	CGGCGTTAGCAGGAAGGTAA
926	b4192	yjfR	CCAAGCCACCACATCGCAAA
534	b4206	ytfB	ATCTAACTGCGCTTCACGCG
289	b4226	ppa	GTCCAGAGACAGGGTGTGGT
368	b4233	mpl	GGCTGGCATCGTACCCCTGA
531	b4234	yjgA	AGGCTCTACGTCGCGCTGGC
523	b4235	pmbA	GGTGGATGATGCGCTACCTT
433	b4238	nrdD	AACCGCGGCAACAGTGGCGC
1228	b4263	yjgR	TCCGACAATGACTCCGCCAG
1421	b4268	idnK	AGCCAGGGAAGTCGATCTTC
1118	b4294	insA_7	TGCACTGGCGCGACATCCGA
887	b4295	yjhU	GCGAGTCCGCATCAGCTTTG
1865	b4311	yjhA	TCCCGGGCGCACCGTCCATT
1419	b4331	kptA	TCCGGTTTGTGTCGGAGGAC
1237	b4336	yjiN	AATGATCGGAATCGGCACGC
1116	b4372	holD	TCACCAGACGGACGTGTGCC
1427	b4385	yjjJ	CTTTCCGGTATCGTCCACCC
2826	b4401	arcA	GCAACATTCGCCTGCTCGCG
Oligonucleotide used in Minimal medium (M9) + Glucose, Fong, S. et al 2004
ID	bname	name	Oligonucleotide
2154	b0030	yaaF	CCCGATTCGCCGTGCACAGA
PTS27	b0114D	aceE	GCCGCCCAGTTCGAGGTCTT
PTS26	b0114P	aceE	TGCCTGCGGCTACGTTTACA
1709	b0117	yacH	GTTGTGTCGATTGCGGTTCC
PTS14	b0118D	acnB	TTCCGGAGTCAGCAGAGGGG
PTS13	b0118P	acnB	ATCGACGCCTGGGGGAACAC
2185	b0162	yaeG	TCGACGACTCGTCCCTGTGA
2180	b0174	yaeS	TGCCCCGGCTTTATGCCCAA
2151	b0188	mesJ	AATAGCGCGCAGAGCGACAC
2113	b0252	yafZ	CCCGGGTCACGCACGCGGGT
2122	b0253	yafZ	CGCTGTAGGCTGTCGAGCAG
2182	b0277	yagK	AGCTCTGAGGGATTCACGCA
2117	b0292	yagY	TTGGGCGGGTAGCAGCAAGC
2125	b0293	yagY	CCGTCGTCAAGCGGTGAAGA
2152	b0306	ykgE	ACGGCATAGGTGCAAGAGCC
2157	b0346	mhpR	ATCGGAGGGGCTACGGCGGA
2142	b0353	mhpT	CCGGGTAGCAAACCGAGTAT
2178	b0364	yaiS	TACTTGGGGTTTCGTAGCCG
2099	b0374	yaiU	TATCCCAGGTACGGTCGTTC
2119	b0513	ybbY	CGCGATGCTTCACCAAGGGT
2127	b0513	ybbY	GCGTGAGCGTAAGCAGGCTA
2183	b0538	b0538	GGCGAGTTTTGACGAGATGG
2187	b0599	ybdH	GCAGTCCAAACGCTGGCGGA
1784	b0619	citA	GCCATGTCGCGTACATGAAG
2110	b0750	nadA	CGGGATGCTTTGCACCGAAG
2120	b0750	nadA	GGGATCGGTATAGTAGTGGG
2116	b0833	b0833	ATCAAGTACCAGTCCCACCG
2124	b0833	b0833	TTTACCGCGCGCTCCGATAC
PTS16	b0871D	poxB	ACGTGATTGCGGTGGCAATC
PTS15	b0871P	poxB	GGGTGGACATCCACTCGATG
1780	b0913	ycaI	ATGTCCCAGGCAATTGGGGC
2150	b1160	ycgW	TCCTGGAGGACACTCTTGAC
2153	b1168	b1168	AGAGCTGCTTCAGTGCCAAG
2144	b1220	ychP	CGGTGATAGCCAGGACTCTA
PTS12	b1276D	acnA	CTTGCCGGGCGGTAGGCAAT
PTS11	b1276P	acnA	TGACTTGGGTAGACGGGTGA
2111	b1330	ynaI	CGCAATCAGGGACGTACAGA
2161	b1421	trg	TCGCTAACCCGGTCCGAATC
1706	b1493	gadB	GGAATGCGACATCGTCGCGC
PTS08	b1676D	pykF	ACCGCCTTCCAGTTTCATGG
PTS07	b1676P	pykF	GCGGATTTCCGGACCTTTGG
2148	b1696	b1696	CTCAGCCCCCTGAAACTGAA
2149	b1783	yeaG	GCCGGATAACGTGCAATGAC
2179	b1803	yeaX	TTCCTCCAGCCGAACGGCAA
2146	b1821	yebN	ATAAGGCCGGTTCGCAATGC
2145	b1834	b1834	AGATCGTCGCTGAGGCTGAT
PTS06	b1854D	pykA	TACACGGATTTTGGGCCCCT
PTS05	b1854P	pykA	TCTTCAGGCGAGCCGTGAGA
1785	b1894	insA_5	gggttgagaagcggtgtaag
1702	b1997	yi21_3	taactggctggctgctacac
2181	b2098	yegT	GGCGGTACAGGCATACGACC
2128	b2146	b2146	AAACGGCACCGAGGGCATTA
PTS02	b2388D	glk	TGAGAACGCCCAGGTATGGT
PTS01	b2388P	glk	CCCAGTCACCGGTAATTGGG
PTS10	b2464D	talA	GTTGACACGCGACCGGGTAC
PTS09	b2464P	talA	CCGGCAGCTTTGAGTAACAG
PTS23	b2465D	tktB	agttcttccagcggcaggtc
PTS22	b2465P	tktB	taccaggttgggtcggtagg
2115	b2503	b2503	TAAAGACCCTGTAACCGCCC
1782	b2549	yphG	GGATGTATATCCTGCGGCCC
2114	b2736	ygbJ	CCGTACCGGGTTTCAGATGT
2123	b2737	ygbJ	CAGGCATTGCTGTTCAGGTC
PTS32	b2741D	rpoS	TCTTCGGCCGTTAACAGTGG
PTS31	b2741P	rpoS	CAACACACGCTGTGTGGCTC
1707	b2785	rumA	ACGACTTTAGCGCGGGCATA
PTS29	b2976D	glcB	accaggtagcccagttcacg
PTS28	b2976P	glcB	gttctgccagcaactgacga
2159	b2986	yghT	CGACGACAGGCAAGCATATG
1705	b2988	gss	CTACGGAATACGGCGTCATC
2129	b3074	ygjH	CCGCACACAACAGCATGCAT
1787	b3323	gspA	GGCCTTACCTTGCCAGGAAA
2156	b3370	yhfM	GCCACTTCACCCACAGATAC
2143	b3422	rtcR	GCAGGCAGGCGTAGACCTCT
1786	b3471	yhhQ	ACGCACGGTCAGGTCGGTAG
1703	b3482	rhsB	tgtccggtaactgctgtagg
1704	b3565	xylA	TCCGCCCCGTTCCAGCAGAA
2160	b3570	bax	TCCTTGGTGTTCCGGAAGGG
2184	b3587	yiaW	CTGTTTCTCCAGCCCGGCAA
2155	b3661	nlpA	GCATCGTTCGGTAGCAACGA
2100	b3820	yigI	CAATGACCCCGCCGTGCAAA
2118	b3844	fre	CAGCCACGCTTCTCCGTGGG
2126	b3845	fre	AGCGCCAATATGCAGCTCGA
2147	b3857	mobA	ATAAGCGCGTCAGCGACATG
1781	b3896	yiiG	TGGTGCGGCAGGTTGACTAT
PTS25	b3916D	pfkA	TCTCGTCGCGGAATTCCGGG
PTS24	b3916P	pfkA	GACACGCTGTAACGGTCTAG
1710	b3967	murI	ggagatccggtaagagatgc
1708	b4017	arpA	TTAATAGAGGCGTCGCCAGC
1779	b4020	yjbB	CGACGCTCCGGCTAAGGACA
PTS04	b4025D	pgi	CCGCCAGATCGCACTCTTTC
PTS03	b4025P	pgi	CGCCAGCGTCTCTTCAGTGA
PTS21	b4067D	yicG	cggagatccccaagaatgag
PTS20	b4067P	yicG	gcgttttgatgcccagtagg
PTS19	b4068P	yicH	CGCGTGTGACGCTGGTGTTC
PTS18	b4069D	acs	GTCAAGGCAGTTTGCCGCCA
PTS17	b4069P	acs	ATGGACACATTACCGGGGGC
1783	b4088	alsB	CGCCTTCTGAAGGAGAGGCA
2112	b4155	yjeA	CCCTGCGAATGCCCGGGGCC
2121	b4156	yjeA	TGGCTCATACAAGGCGTCTC
2158	b4183	yjfK	GACGGCGGCTACCGTAAATT
2186	b4261	yjgP	CAGGCCGCAGGCATGCATTA
2098	b4325	yjiC	TGCCACGAGTAAGAGGCGGA
1788	b4340	yjiR	TCTGATACGCCTGCTGCACG
1711	b4340	yjiR	TCTGATACGCCTGCTGCACG
PTS30	b4401P	arcA	CGTTCTTACCCGGCAGATTG
Oligonucleotide used in Minimal medium (M9) + Glycerol, Fong, S. et al 2004
ID	bname	name	Oligonucleotide
3297	b0065	yabI	AGCACCGTACCGGGTAGAAT
2282	b0096	lpxC	TGCTCGTTGACCAGACACGT
3693	b0104	guaC	GCTTGCCACTCTTCGACAGA
2360	b0119	yacL	CATTAAACCAGTGCCCGACC
2839	b0149	mrcB	CAGCCGCGTTTGCCACGAGG
3298	b0156	yadR	ACCGCCACCGGTGATATACA
2400	b0172	frr	GGTTCAGGCCAAGATCGGAC
2364	b0184	dnaE	atgtcccgctccgtagaact
2780	b0200	gmhB	tactaccaccagcgcaaagc
2340	b0220	ivy	ACAGCGATACGTTGCGAGCC
2335	b0222	lpcA	TCACGGTAGCGACCGGTCAA
2402	b0224	yafK	GGCCCTAAGCCGCCGGAATA
2396	b0226	dinJ	ACGCGCGACCTTTGTGAGGG
3670	b0229	fhiA	TTTACGCCGGGTTTGCGCCT
3680	b0260	mmuP	ACGTGAAACGCTCCGGTCTC
3272	b0267	yagA	GAGCCACTTGTAGCCGGTGG
2940	b0325	yahK	GTCGACAATGCAGCCGACAC
2308	b0382	yaiB	CGCGCAGCAGCTCCGTATCG
2344	b0391	yaiE	CATCTCTTCCGGCTCAGCGG
3681	b0394	mak	GGTGCCGCCTAAATCGATAC
3668	b0423	thiI	CCCGGAATACGGGTCAGAGC
2855	b0434	yajG	AGGCTTGGATCCTGCTGTGG
2342	b0436	tig	CGTCCTGGCGTACAGACGCG
3688	b0467	priC	GCACTGTCCCACTCGCGCAA
3299	b0478	ybaL	ATCGCACCGGGAATGGCGAT
2789	b0480	ushA	GCGCCGCCAGACCATATTCG
3273	b0489	ybbK	TCTTGCGACCAATGCGATCC
3686	b0493	ybbO	cctgccagcacatgaaaacc
3300	b0495	ybbA	GGATCGCCAGCAAGGTTGAC
2857	b0529	folD	AGGGTTACTACCCACCAGCA
2281	b0607	uspG	GACGCACATCAGCGGCAAAA
3301	b0607	uspG	CGACGCACATCAGCGGCAAA
3684	b0611	rna	GAGAGGGCCAGGACATAGCG
2230	b0623	cspE	CGTTTGCAGCAGAAGGGCCT
2309	b0642	leuS	TCGTACGTCCACGGTGCCGG
2243	b0643	ybeL	TTCCAGGTCACGTCTGACAG
2928	b0658	ybeX	AAACGTGAGTGGGCGGACTC
2341	b0710	ybgI	AAGCCTGGCTGGCGGTGACA
2275	b0735	ybgE	GAACCTTCTGCGGACGAAAG
3685	b0766	ybhA	ATTGGGTCCGCTTCCAGCAC
3689	b0773	ybhB	TCCGGGTCGTAGCAGGTGAC
2374	b0786	ybhL	AGCTCCATCACGGCCGCGGA
3667	b0807	ybiN	GCGGGTGTAAGCGTGAGGAA
2343	b0814	ompX	TTGGCCCTGAGCGTCGCTCT
3691	b0817	mntR	atgtccacctgacgagcttc
2837	b0828	iaaA	CGGCGTTAAACAGTGGACAC
3302	b0837	yliI	CTTGCCAGTGACGCAACTCG
2411	b0838	yliJ	GTACTGTGCCGCCAGATAGC
2371	b0866	ybjQ	TGCCCGACCGTTTCGTAGTC
2793	b0870	ltaE	ggaaagctctgctgcgtagt
2783	b0877	somA	GTCCACGTGCCAGACTAAGA
3303	b0878	macA	GCCAATCGCCACCGACAGAG
2279	b0881	clpS	AAATGGCCTTCCCCTGGTAG
3304	b0885	aat	TGACACGATAGGGCGAGCGT
2778	b0888	trxB	GTTGGCCGCCTTTTTCCATG
2924	b0897	ycaC	TTTCCCGGGCGAGCAATGTA
3674	b0919	ycbJ	CATCCGCTCCAGTAGCAGGA
2293	b0926	ycbK	CCCTTGCAGGCGATACAACT
3677	b0932	pepN	GTTGAGACGAAGGGGAGCAT
3305	b0955	ycbZ	ACGTAAGCGGATGGAGTGGC
2274	b0963	mgsA	ACCCCCCATTGGGCCACTCA
3338	b0968	yccX	GCCCTTCTTCACCGCAAGCA
2250	b0970	yccA	TGCGTAAGGGCACCCAGAAG
3690	b0987	gfcA	CAGTGGTAGTAGCAGTCGTG
2241	b1004	wrbA	TCCGGTACACGCTTAACGAC
2367	b1033	ghrA	CAGGGTGTGCCTGTAGCTTG
2336	b1064	grxB	GTAGCCATTGACCTTGCGCA
2348	b1084	rne	TAGTGGGAGGAAACCGTGAC
2942	b1119	nagK	accagctcacacactgcatc
2935	b1128	ycfD	GATCGTAGCTTTCGAACGGG
3682	b1158	pinE	CCTCCACCAGCACGACAAGA
3274	b1172	ymgG	CGAGGCCATTGCCGGTCAGA
2930	b1180	ycgM	CACTGGCTCTTCGGGCACTG
3339	b1187	fadR	CCTTCGTCGGCTTGCCATGT
2361	b1219	ychN	CTGTGACCGCATCAGACATG
2841	b1248	yciU	GCTGGATCGAGATTGTCGGC
3340	b1251	yciI	GTGCTAAATGTGCCGGACGA
3683	b1255	yciC	CTAACGGGCACGCCGTCATT
2226	b1256	ompW	TCCACCCAGACTTCCTAACG
2315	b1259	yciG	CTTCAGATGCGCGTTGCGGA
3669	b1282	yciH	gatcgacaccggtaatcagg
2357	b1288	fabI	GTCACCATCCAGCTGATCGC
3275	b1297	ycjK	CCGAGGCCGGGAAATAACAC
3341	b1300	puuC	GGTCGATATCGACGCTCTTG
2235	b1333	uspE	GATGACGCCCTGACGCATAG
2232	b1376	uspF	GAGGCATAGTAGGGCAGTGA
3342	b1413	hrpA	CACCACCTGGTGATCACGAA
2408	b1420	mokB	gtttgtcgggtcaggagtgt
2376	b1426	ydcH	CCTGGCTGGCGGCTTAGGAA
3343	b1431	ydcL	AGGTTTACCTGTAGCCGAGG
3344	b1452	yncE	GTTTGCGGCTTTGCGAAGTG
3276	b1478	yddN	CATGGCCCAGAATTACGCCG
2927	b1479	sfcA	CCATGCTCGTTCCGCTTGTT
2310	b1512	lsrR	AACGTGTCAGGCCGAGACGA
2372	b1539	ydfG	ATAGCGGCGCGGTTGCGAAC
2358	b1541	ydfZ	AGACGAATCAGGTCCAGTGG
2284	b1583	ynfB	cactgtcgccagactcaatc
2788	b1619	hdhA	GTTAGCTGCGTCGGCGTTAA
2838	b1635	gst	AGGCACCTGCCCCTTAGGGT
3345	b1636	pdxY	ACCTGACGGACGATACCGAG
3678	b1637	tyrS	CAAGCTGTCAGCGGTAGGAT
2404	b1642	slyA	GACTGGTCTGGAGGTAACTG
3346	b1646	sodC	TCAAGATGCCCGCCTGCGGA
2403	b1654	grxD	GAAGGTCGGCCAGTTAGCAT
2277	b1667	ydhR	AGATCCCACCGGCTTCGTGG
2366	b1687	ydiJ	TCGGTCGACATTGTCAGACG
3347	b1706	ydiU	TGACATACCAGGCAGTAGGG
2291	b1724	ydiZ	TTTGGGTAAGCCCCGAAACC
2317	b1725	yniA	GCGACAGTAACTCCAGTTGG
2398	b1740	nadE	TCGGCCTGAACACCATAGGG
2842	b1743	spy	GACCGAACTTGCCTTTGTGG
2836	b1757	ynjE	CGCTGGGGCGAGTATCTATC
2287	b1778	msrB	GCATCACAGTTACCGCAACG
2248	b1782	mipA	CTAAGCCACGGAACCAGAAG
2931	b1795	yeaQ	TGATCCATCCGCCGACTACG
2829	b1809	yoaB	GCGACAACCCAAGCATCCCA
2338	b1810	yoaC	CTGGTCAGCTCGCGCCGTAA
3277	b1811	yoaH	ACGATTCGCTCGCCGGAGTG
2227	b1824	yobF	TCTTCGCCCGCAGGCATAAC
2791	b1831	proQ	CAGCTCGAAGTGTAGAGACG
2337	b1836	yebV	ACGGGTACGGTAAAGGACAG
2925	b1848	yebG	AGCCAGGTGTCAAGCAGATC
2314	b1854	pykA	TCTTCAGGCGAGCCGTGAGA
3362	b1885	tap	cgttgctgattgctctgctc
2333	b1905	ftnA	aattgccggtatcagtcagg
2932	b1908	yecA	GGGCTCGGGAAGAAAGTGGA
2401	b1919	dcyD	cgcgagaaattccagcttac
2332	b1928	yedD	CCTATCGCTTCCGGGCTGAC
2244	b1929	yedE	CATTGTTGGCCCACAGCGCT
3363	b1952	dsrB	GATACCGTCCTGATGCCCTG
3364	b1955	yedP	AGCAAGCTGGATCACTGCGC
3365	b1957	yodC	CCCCCGGAACAAGCTCGGTT
2776	b1967	hchA	GTCCACGCCATCAAGATCAG
2937	b1976	yeeI	GTCGAGGGCGCTTAAGATGT
2833	b2001	yeeR	ATAGCCAGCCAGTAAGGCCG
2245	b2007	yeeX	CCCCGGCTTGATGTAATCGC
2346	b2009	sbmC	ACCCACTCCTTCGGCACAAT
2834	b2013	yeeE	GTACCAAGCCACGGGAACGC
2412	b2017	yefM	TTAGCGGGGGAGCGCAGTAG
2410	b2018	hisL	caggatgatggtgatgatgg
3278	b2048	cpsG	ggacatcaccgcctaacaca
2334	b2080	yegP	ACATCTGGCTGGAGCCGATA
2247	b2097	fbaB	TCTACGTAGTCATGTCCGGG
2831	b2104	thiM	ACTGGCCTCTTCGGTTTCGA
3366	b2105	yohL	CATCCCCCTGGTGAACGATG
2844	b2113	mrp	CCACATGCAACGTGTCGTCC
2370	b2153	folE	AGTGATATCGCGCACGGTGA
2929	b2154	yeiG	TGTGATCACGAGGTGGAGGG
2312	b2175	spr	GTTTCACTACCCACTGCACG
2228	b2185	rplY	AGCTTCGGTTTGTACGGGTG
3309	b2209	eco	CTTCCAGCGTCTGACCGATT
2339	b2216	rcsD	TCGACGCGCTTTTGGATAGC
3368	b2233	yfaL	ACTCCAGTCCTGCGTAATGC
3687	b2259	pmrD	CCCACTTTCACGGCGAAGTC
2286	b2294	yfbU	ACTCGCGATCCAATTCACGC
2845	b2315	folC	GGTTTCAGGACGCCAAGACG
3672	b2324	mnmC	TCGGGAAACAGGTGTACCCT
2795	b2329	aroC	gacggtcgaggtcatgttg
2792	b2343	yfcZ	ACACGCGGCTGTAAGACGCG
3671	b2377	yfdY	CACAAGCCGGGGCAAGAAAC
3369	b2411	ligA	ACGGTCCTGCACACGTTTGT
2786	b2426	ucpA	CGATCTCAGGGGAGATATCC
2406	b2450	yffS	GCTACTATGCCCGCGCGTCT
2222	b2463	maeB	CAAGACAAGGTGCGGCAACG
3370	b2468	aegA	AAAGGACAGGCCACCACGCA
2405	b2513	yfgM	atcaacctgatggctgttcc
2316	b2516	yfgA	GCGGATATATCCGCGCAGGA
2369	b2518	ndk	GCCACGTGCCTGTTCAACGG
3371	b2520	yfhM	GCACCTTACCGGCACTCTGT
2218	b2521	sseA	ACCATGTCGTGGACATAGGC
2939	b2523	pepB	TCGTCTGCCCCGTTCAAATG
2859	b2532	yfhQ	AGGCTACAACCGGCTAACGC
3352	b2581	yfiF	GACTCTGTTTGTCATCGCGG
2345	b2585	pssA	TCCTGTTCGAGATACAGGGC
2365	b2587	kgtP	caacaggaggatgccagact
2858	b2610	ffh	CTCACGCACTACCGGCAGAG
2863	b2664	csiR	tgattcaccaccgtgaccag
2777	b2665	ygaU	AGTGACCGTCGCTTTGCCGT
2280	b2672	ygaM	CGGCTTCAGCTTCCCCTTTG
2407	b2687	luxS	CTGCTCATCTGGCGTACCAA
2288	b2696	csrA	AGCCTGGATACGCTGGTAGA
3679	b2738	ybgL	CCATCCGCGGCGACTTTGGA
3353	b2748	ftsB	CGTTTGTAGCTTGCTGTGCC
3354	b2770	ygcR	cctgttcatcagcaccgagt
2231	b2779	eno	GTAGAAGCACCTGACGGAGC
3355	b2781	mazG	CGTCCAGCACTTCGTAGGTT
2397	b2830	nudH	GTGTCCCAACGCACCAAACG
2779	b2834	tas	AACCCTTGCGTTTCGGGGCG
3692	b2836	aas	TAGGTTGCGTCGGGTCGAGA
2781	b2897	ygfY	TCGGCCGGTTTACCGTGATT
2828	b2898	ygfZ	CCATCTGGCTGACATCTGCT
2285	b2909	ygfB	TCAGGTCGTGAAGTAGCGGT
3666	b2924	mscS	TACGGGAGATCATCAGGCGA
2349	b2935	tktA	GAGGTGCAGCAGGCTGTAGA
3356	b2948	yqgE	cggcttgttgacgatgatcc
2289	b2989	yghU	TTTCTGACCGTTCGGCGTTC
2368	b3001	yghZ	TTCCAGCGCGTTAACGTGAC
3357	b3003	yghA	CGTCTTCTTCTTCCACGGGA
2856	b3011	yqhD	TGCCGTCCAGTACAGAACCG
2409	b3012	dkgA	CGTTCCACAGCTTAGTGGTG
2249	b3024	ygiW	ACAGTCGTTACGCTGCCGTT
2926	b3035	tolC	GCACCTAAACCTAGCTGTGG
2415	b3041	ribB	ACAGTCATGGTTTCTGCCGG
3358	b3042	yqiC	GCGTCAGCTGCGCTTGTAGG
3279	b3068	ygjF	TGTGGGTCATACTGTTCCGC
2413	b3089	sstT	CATCAACACCAGGATGGGGG
2242	b3097	yqjC	GCTTCGCCTCGGCTAAATCT
2943	b3129	sohA	TCCTGTTCATCTCCCAGTCG
2350	b3157	yhbT	CTTGTTTACGCGCCGCAATC
3280	b3162	deaD	ACGTCGCGGCCATTCAGCAG
2313	b3163	nlpI	CCCTCAGACCGAGACTATCA
2933	b3175	secG	TAGCGGAAGCGCCTGCTCCG
2941	b3187	ispB	CGCCGCCGCTGACGATGTAA
2830	b3209	elbB	GCTTATCCGGTGCAAAGCAG
3359	b3244	tldD	CGCACACCAACGCCCTGATC
2363	b3253	yhdH	ATCTTCGCTGGTGCGTACAG
3360	b3279	yrdA	AAGATCGCGGTATGGGCGTA
2846	b3291	mscL	TAAGCCCAGAGGAGGCATGA
3281	b3337	bfd	CCCGGACACATTTACCGCAC
2331	b3349	slyD	GAGATCAGGGAACCGTGACC
2835	b3352	yheS	CCAGCTTCCCGGAAAGGTGT
3673	b3358	yhfK	GGCAGGAACGAGGGAGAAGA
3361	b3396	mrcA	GTTGTGGCTCGATGTAGCGG
2290	b3432	glgB	atcacccacacatcggtagc
2246	b3433	asd	CTGGCCAAGCTGAGAAGTAG
3325	b3447	ggt	CCGCCCTCCTTGAGAATATC
3326	b3448	yhhA	TGCTGAGTCTGCATCTGGGT
3676	b3459	yhhK	AAAACGCGCGGCGTAGATAC
2784	b3472	dcrB	tcccggtagcgttactttcc
2414	b3493	pitA	ACCATGGCAAGGCCATGAGA
2827	b3554	yiaF	GTTGGTAGACGTTCACCGCT
3327	b3592	yibF	CATTCGCCCTCTTCGGTCAC
2273	b3610	grxC	CAAGTCATCACAGCCGCCAA
2219	b3611	yibN	CGCGTAGCTTCACCACGAGT
3328	b3612	pgmI	GGTTAACGTGGCCTACTTCG
2864	b3639	dfp	TCGGTCATGGCTACGCGGAC
3296	b3648	gmk	TTCACCAGGACGCGGTTGGC
3695	b3658	selC	ggccccaactggatttgaag
2861	b3706	trmE	ATCCCCTGATCGAGCACGCT
2785	b3780	rhlB	aagggccagtgcctgaat
2234	b3782	rhoL	ctgcctggtcacaggagagt
2840	b3836	tatA	gatggagccgagctttttgg
2934	b3843	ubiD	CGCCACGCGCTTTGGCGTAC
2359	b3858	yihD	CCGCATCTTTCGCGGAATCA
3329	b3866	yihI	TTGCTGCCTGACGTGGTGTT
2938	b3871	typA	TCCATCACGCGCTCTTGGGT
2347	b3885	yihX	CGCCTGCCAGCCGTGAGAGA
2794	b3928	yiiU	CAGACCTCTTCCATGCGACC
2221	b3929	menG	gtacagcaacccgttgtcct
2229	b3984	rplA	acagctacgtccacgctttc
2936	b4023	pagB	TCAGCCTCACGCTCAACCAT
3675	b4042	dgkA	CATCACCAGCATCACGGAGC
3330	b4045	yjbJ	CGGGTTTCCCAATCCACGAC
2782	b4056	yjbQ	TCAGAGAGGCGGAGGTATGT
2373	b4108	yjdM	CTCGTCGCTTTCCTGTGCAG
3331	b4126	yjdI	ATGACGGTATTTCAGCGCGC
2862	b4135	yjdC	ctgacgacgccagacatcta
2292	b4143	groL	gagcaacggaaacaccatct
2220	b4144	yjeI	GACCGGCAGCACTCAATTCG
2843	b4188	yjfN	CCTGCGGATCCCCTGAAATA
2278	b4189	yjfO	ctgtaacccttgcgtctggt
2860	b4206	ytfB	ATGATCCCCCGACGATGCAT
2790	b4207	fklB	CCAATGCCGTAGCTTGCTTG
2832	b4208	cycA	GACCCCATAAACAACCCCGT
2362	b4227	ytfQ	CCCTTGTGCAACGAAGGAAC
2233	b4243	yjgF	gttatccagcgactgacgtg
2276	b4255	yjgD	TCGGTCACTTCGTAACCGAG
2787	b4260	pepA	TCGGAACATGGTGCAGCAAC
2311	b4335	yjiM	AAACCACAACCGCACCGGCT
2399	b4377	yjjU	GCAGATAAACGCCGAGAGGT
3694	b4390	nadR	gtgcaacgcctccagctttt
2375	b4391	yjjK	TCTTGATGTCTGGCTGCGGA
