# Supplementary material for: Genome-Wide Identification of Transcription Start Sites, Promoters and Transcription Factor Binding Sites in E. coli
Source: PLoS One. 2009 Oct 19;4(10):e7526. doi: 10.1371/journal.pone.0007526 (PMC2760140; doi:10.1371/journal.pone.0007526)
Supplement: Table S3 — Genes with known, predicted, conserved, putative, hypothetical or unknown function. (0.07 MB XLS) [file pone.0007526.s009.xls]

## Sheet: Hoja1
Table S3. Genes with known, predicted, conserved, putative, hypothetical or unknown function.
Genes with known function
	bname	Gene name	Gene product name	Functional class
ECK120001509	b0008	talB	transaldolase B	Central intermediary metabolism: Non-oxidative branch, pentose pathway
ECK120000259	b0096	lpxC	UDP-3-O-acyl-N-acetylglucosamine deacetylase	Macromolecule synthesis, modification: Lipopolysaccharide
ECK120002193	b0118	acnB	aconitase B/aconitase B/aconitase B	Energy metabolism, carbon: TCA cycle
ECK120000598	b0149	mrcB	MrcB	Cell envelop: Murein sacculus, peptidoglycan
ECK120000892	b0169	rpsB	30S ribosomal subunit protein S2	Ribosome constituents: Ribosomal proteins - synthesis, modification Riboso
ECK120002712	b0174	ispU	subunit of undecaprenyl diphosphate synthase	Central intermediary metabolism: Sugar-nucleotide biosynthesis, conversions
ECK120001080	b0240	crl	Crl transcriptional regulator	Cell envelop: Surface structures
ECK120000760	b0386	proC	ProC	Amino acid biosynthesis: Proline
ECK120002064	b0401	brnQ	BrnQ branched chain amino acid LIVCS transporter	Transport/binding proteins: Mechanism not stated
ECK120002852	b0427	yajR	YajR MFS transporter	Transport/binding proteins: MFS family
ECK120000992	b0436	tig	trigger factor; a molecular chaperone involved in cell division	Cell division: Cell division
ECK120000984	b0452	tesB	TesB	Fatty acid biosynthesis: Fatty acid and phosphatidic acid biosynthesis
ECK120001647	b0462	acrB	AcrB RND-type permease	Transport/binding proteins: RNDfamily
ECK120002864	b0465	kefA	KefA	Transport/binding proteins: Outer membrane channel
ECK120002335	b0478	ybaL	YbaL CPA2 transporter	Transport/binding proteins: CPA2 family
ECK120000322	b0529	folD		Biosynthesis of cofactors, carriers: Folic acid
ECK120000847	b0611	rna	RNase I, cleaves phosphodiester bond between any two nucleotides	Macromolecule degradation: Degradation of RNA
ECK120001279	b0628	lipA	lipoate synthase monomer	Biosynthesis of cofactors, carriers: Lipoate
ECK120000623	b0750	nadA	quinolinate synthase	Biosynthesis of cofactors, carriers: Pyridine nucleotide
ECK120002021	b0814	ompX	outer membrane protein X	Cell envelop: Outer membrane constituents
ECK120001021	b0888	trxB	thioredoxin reductase monomer	Central intermediary metabolism: 2'-Deoxyribonucleotide metabolism
ECK120000936	b0893	serS	seryl-tRNA synthetase	Macromolecule synthesis, modification: Amino acyl tRNA syn; tRNA modification
ECK120000090	b0930	asnS	asparaginyl-tRNA synthetase	Macromolecule synthesis, modification: Amino acyl tRNA syn; tRNA modification
ECK120000688	b0932	pepN	aminopeptidase N	Macromolecule degradation: Degradation of proteins, peptides, glyco
ECK120003097	b0963	mgsA	methylglyoxal synthase	Central intermediary metabolism: Pool, multipurpose conversions of intermed. met'm
ECK120001494	b1004	wrbA	WrbA monomer	Amino acid biosynthesis: Tryptophan
ECK120000850	b1084	rne	Rne	Macromolecule degradation: Degradation of RNA
ECK120000881	b1089	rpmF	50S ribosomal subunit protein L32	Ribosome constituents: Ribosomal proteins - synthesis, modification Riboso
ECK120000275	b1187	fadR	FadR transcriptional dual regulator	Degradation of small molecules: Fatty acids
ECK120000450	b1237	hns	H-NS transcriptional dual regulator	Macromolecule synthesis, modification: Basic proteins - synthesis, modification
ECK120001296	b1276	acnA	aconitase/aconitase	Energy metabolism, carbon: TCA cycle
ECK120001482	b1288	fabI	enoyl-ACP reductase (NAD[P]H)/enoyl-ACP reductase (NADPH)/enoyl-ACP reductase (NADH)	Fatty acid biosynthesis: Fatty acid and phosphatidic acid biosynthesis
ECK120001007	b1421	trg	Trg	Chemotaxis, motility: Chemotaxis and mobility
ECK120000418	b1619	hdhA	HdhA	Central intermediary metabolism: Pool, multipurpose conversions of intermed. met'm
ECK120003467	b1635	gst	Gst	Biosynthesis of cofactors, carriers: Thioredoxin, glutaredoxin, glutathione
ECK120001032	b1637	tyrS	tyrosyl-tRNA synthetase	Macromolecule synthesis, modification: Amino acyl tRNA syn; tRNA modification
ECK120003475	b1646	sodC	superoxide dismutase precursor (Cu-Zn)	Protection responses: Detoxification
ECK120000795	b1676	pykF	pyruvate kinase I monomer	Energy metabolism, carbon: Glycolysis
ECK120000365	b1761	gdhA	GdhA	Amino acid biosynthesis: Glutamate
ECK120003555	b1782	mipA	scaffolding protein that interacts with murein polymerase and murein hydrolase	Cell envelop: Murein sacculus, peptidoglycan
ECK120000993	b1845	ptrB	protease II	Macromolecule degradation: Degradation of proteins, peptides, glyco
ECK120000794	b1854	pykA	pyruvate kinase II monomer	Energy metabolism, carbon: Glycolysis
ECK120000093	b1866	aspS	aspartyl-tRNA synthetase	Macromolecule synthesis, modification: Amino acyl tRNA syn; tRNA modification
	b1894	insA		KpLE2 phage-like element; IS1 repressor protein InsA
	b1997	insC		KpLE2 phage-like element; IS2 insertion element repressor InsA
ECK120003666	b2000	flu	CP4-44 prophage; antigen 43 (Ag43) phase-variable biofilm formation autotransporter	Cell envelop: Outer membrane constituents
ECK120001822	b2009	sbmC	DNA gyrase inhibitor	Macromolecule synthesis, modification: DNA - replication, repair, restr./ modification
ECK120003711	b2095	gatZ		Some information, but not classifiable: Not classified (included putative assignments)
ECK120003713	b2098	yegT	YegT MFS transporter	Transport/binding proteins: MFS family
ECK120004467	b2104	thiM	hydroxyethylthiazole kinase	Biosynthesis of cofactors, carriers: Thiamin
ECK120000579	b2114	metG	methionyl-tRNA synthetase	Macromolecule synthesis, modification: Amino acyl tRNA syn; tRNA modification
ECK120000663	b2215	ompC	OmpC	Cell envelop: Outer membrane constituents
ECK120002426	b2388	glk	glucokinase	Degradation of small molecules: Carbon compounds
ECK120000527	b2411	ligA	DNA ligase	Macromolecule synthesis, modification: DNA - replication, repair, restr./ modification
ECK120000187	b2414	cysK	CysK	Amino acid biosynthesis: Cysteine
ECK120003833	b2418	pdxK	PdxK	Biosynthesis of cofactors, carriers: Pyridoxine
ECK120001731	b2464	talA	transaldolase A	Central intermediary metabolism: Non-oxidative branch, pentose pathway
ECK120000294	b2610	ffh	protein component of the signal recognition particle (SRP)	Chromosome replication: Chromosome replication
ECK120001410	b2696	csrA	carbon storage regulator; controls glycogen synthesis, gluconeogenesis, cell size and surface properties	Global regulatory functions: Global regulatory functions
ECK120000503	b2741	rpoS	RNA polymerase, sigma S (sigma 38) factor	Global regulatory functions: Global regulatory functions
ECK120000252	b2779	eno	Eno	Energy metabolism, carbon: Glycolysis
ECK120000801	b2780	pyrG	PyrG	Central intermediary metabolism: Nucleotide interconversions
ECK120001391	b2935	tktA	TktA	Central intermediary metabolism: Non-oxidative branch, pentose pathway
ECK120002421	b2988	gsp	Gsp	Central intermediary metabolism: Polyamine biosynthesis
ECK120000458	b3041	ribB	3,4-dihydroxy-2-butanone 4-phosphate synthase	Biosynthesis of cofactors, carriers: Riboflavin
ECK120000248	b3075	ebgR	EbgR transcriptional repressor	Degradation of small molecules: Carbon compounds
ECK120002374	b3089	sstT	SstT DAACS transporter	Transport/binding proteins: DAACS family
ECK120000058	b3210	arcB	ArcB sensory histidine kinase	Global regulatory functions: Global regulatory functions
ECK120004229	b3234	degQ	serine endoprotease, periplasmic	Macromolecule degradation: Degradation of proteins, peptides, glyco
ECK120001162	b3291	mscL	MscL	Transport/binding proteins: Mechanism not stated
ECK120000903	b3298	rpsM	30S ribosomal subunit protein S13	Ribosome constituents: Ribosomal proteins - synthesis, modification Riboso
ECK120004246	b3323	gspA	general secretory pathway component, cryptic	Chromosome replication: Chromosome replication
ECK120001237	b3364	tsgA	YhfC MFS transporter	Transport/binding proteins: MFS family
ECK120000739	b3396	mrcA	peptidoglycan synthetase; penicillin-binding protein 1A	Cell envelop: Murein sacculus, peptidoglycan
ECK120002114	b3493	pitA	PitA	Transport/binding proteins: Mechanism not stated
ECK120000103	b3572	avtA	ENZRXN0-6291/valine-pyruvate aminotransferase	Amino acid biosynthesis: Alanine
ECK120000004	b3639	dfp		Macromolecule synthesis, modification: DNA - replication, repair, restr./ modification
ECK120001180	b3742	mioC	flavoprotein involved in biotin synthesis	Chromosome replication: Chromosome replication
ECK120001495	b3747	kup	Kup potassium transporter	Transport/binding proteins: Mechanism not stated
ECK120002222	b3775	ppiC	peptidyl-prolyl cis-trans isomerase C (rotamase C)	Macromolecule synthesis, modification: Protein modufication
ECK120000203	b3809	dapF	diaminopimelate epimerase	Amino acid biosynthesis: Lysine
ECK120000328	b3844	fre	FMN reductase	Energy metabolism, carbon: Electron transport
ECK120000690	b3847	pepQ	proline dipeptidase	Macromolecule degradation: Degradation of proteins, peptides, glyco
ECK120001761	b3857	mobA	molybdopterin guanine dinucleotide synthase	Biosynthesis of cofactors, carriers: Molybdopterin
ECK120000691	b3916	pfkA	6-phosphofructokinase-1 monomer	Energy metabolism, carbon: Glycolysis
ECK120001004	b3919	tpiA	triose phosphate isomerase monomer	Energy metabolism, carbon: Glycolysis
ECK120001809	b3929	rraA	ribonuclease E inhibitor protein	Biosynthesis of cofactors, carriers: Menaquinone, ubiquinone
ECK120001810	b3930	menA	1,4-dihydroxy-2-naphthoate octaprenyltransferase	Biosynthesis of cofactors, carriers: Menaquinone, ubiquinone
ECK120000880	b3936	rpmE	50S ribosomal subunit protein L31	Ribosome constituents: Ribosomal proteins - synthesis, modification Riboso
ECK120000218	b4042	dgkA	DgkA	Fatty acid biosynthesis: Fatty acid and phosphatidic acid biosynthesis
ECK120001448	b4051	qor	Qor	Energy metabolism, carbon: Electron transport
ECK120000230	b4052	dnaB	DnaB	Macromolecule synthesis, modification: DNA - replication, repair, restr./ modification
ECK120000001	b4053	alr	alanine racemase 1, PLP-binding, biosynthetic	Amino acid biosynthesis: Alanine
ECK120000592	b4143	groL	GroEL, chaperone Hsp60, peptide-dependent ATPase, heat shock protein	Cell division: Cell division
ECK120000896	b4200	rpsF	30S ribosomal subunit protein S6	Ribosome constituents: Ribosomal proteins - synthesis, modification Riboso
ECK120002311	b4208	cycA	CycA serine/alanine/glycine APC transporter	Transport/binding proteins: APC family of transport protein
ECK120000746	b4226	ppa	Ppa	Central intermediary metabolism: Pool, multipurpose conversions of intermed. met'm
ECK120000732	b4235	pmbA	protease involved in Microcin B17 maturation and in sensitivity to the DNA gyrase inhibitor LetD	Macromolecule synthesis, modification: Proteins - translation and modification
ECK120001380	b4372	holD	DNA polymerase III, &psi; subunit	Macromolecule synthesis, modification: DNA - replication, repair, restr./ modification
ECK120002573	b4408	csrB	CsrB RNA
ECK120004317	b4484	cpxP	CpxP	regulator of the Cpx response and possible chaperone involved in resistance to extracytoplasmic stress
Genes with predicted, conserved, putative, hypothetical or unknown function.
ECK120001523	b0065	yabI	conserved inner membrane protein	Unknown proteins, no known homologs: Unknown function
ECK120002328	b0119	yacL	conserved protein	Unknown proteins, no known homologs: Unknown function
ECK120002195	b0126	can	carbonic anhydrase 2 monomer	Some information, but not classifiable: Not classified (included putative assignments)
ECK120002210	b0162	cdaR	CdaR transcriptional activator	Unknown proteins, no known homologs: Unknown function
ECK120001675	b0200	gmhB	D,D-heptose 1,7-bisphosphate phosphatase	Some information, but not classifiable: Not classified (included putative assignments)
ECK120002723	b0219	yafV	predicted C-N hydrolase family amidase, NAD(P)-binding	Unknown proteins, no known homologs: Unknown function
ECK120002747	b0252	yafZ	CP4-6 prophage; conserved protein	Unknown proteins, no known homologs: Unknown function
ECK120002783	b0292	matC	predicted protein	Unknown proteins, no known homologs: Unknown function
ECK120002812	b0329	yahO	predicted protein	Unknown proteins, no known homologs: Unknown function
ECK120002410	b0376	ampH	penicillin-binding protein	Some information, but not classifiable: Not classified (included putative assignments)
ECK120001231	b0382	iraP	anti-adaptor protein for &sigma;<sup>S</sup> stabilization	Unknown proteins, no known homologs: Unknown function
ECK120002056	b0391	yaiE	conserved protein	Unknown proteins, no known homologs: Unknown function
ECK120002851	b0426	yajQ	nucleotide binding protein	Unknown proteins, no known homologs: Unknown function
ECK120002863	b0458	ylaC	predicted inner membrane protein	Unknown proteins, no known homologs: Unknown function
ECK120002890	b0513	ybbY	predicted uracil/xanthine transporter	Some information, but not classifiable: Not classified (included putative assignments)
ECK120000322	b0529	folD		Biosynthesis of cofactors, carriers: Folic acid
ECK120001093	b0597	entH	thioesterase	Unknown proteins, no known homologs: Unknown function
ECK120002941	b0607	uspG	universal stress protein UP12	Unknown proteins, no known homologs: Unknown function
ECK120001230	b0637	ybeB	predicted protein	Unknown proteins, no known homologs: Unknown function
ECK120002400	b0643	ybeL	putative alpha-helical protein	Some information, but not classifiable: Not classified (included putative assignments)
ECK120002414	b0772	ybhC	esterase/thioesterase	Some information, but not classifiable: Not classified (included putative assignments)
ECK120003008	b0791	ybhQ	predicted inner membrane protein	Unknown proteins, no known homologs: Unknown function
ECK120002269	b0828	iaaA	asparaginase III	Some information, but not classifiable: Not classified (included putative assignments)
ECK120003035	b0835	yliG	predicted SAM-dependent methylase	Unknown proteins, no known homologs: Unknown function
ECK120003038	b0838	yliJ	predicted glutathione S-transferase	Some information, but not classifiable: Not classified (included putative assignments)
ECK120003051	b0866	ybjQ	conserved protein	Unknown proteins, no known homologs: Unknown function
ECK120003055	b0870	ltaE	LtaA	Some information, but not classifiable: Not classified (included putative assignments)
ECK120003060	b0877	ybjX	conserved protein	Some information, but not classifiable: Not classified (included putative assignments)
ECK120003068	b0905	ycaO	conserved hypothetical protein	Unknown proteins, no known homologs: Unknown function
ECK120003073	b0919	ycbJ	conserved hypothetical protein	Unknown proteins, no known homologs: Unknown function
ECK120001228	b0925	ycbB	predicted carboxypeptidase/amidase	Some information, but not classifiable: Not classified (included putative assignments)
ECK120003074	b0926	ycbK	conserved protein	Unknown proteins, no known homologs: Unknown function
ECK120002403	b0956	ycbG	putative dehydrogenase	Some information, but not classifiable: Not classified (included putative assignments)
ECK120003147	b1046	ymdC	predicted hydrolase	Some information, but not classifiable: Not classified (included putative assignments)
ECK120001100	b1055	yceA	conserved protein	Unknown proteins, no known homologs: Unknown function
ECK120003152	b1059	solA	<I>N</I>-methyltryptophan oxidase	Some information, but not classifiable: Not classified (included putative assignments)
ECK120003153	b1060	bssS	regulator of biofilm formation	Unknown proteins, no known homologs: Unknown function
ECK120001503	b1127	pepT	PepT	Some information, but not classifiable: Not classified (included putative assignments)
ECK120003195	b1160	elbA	predicted protein	Unknown proteins, no known homologs: Unknown function
ECK120003197	b1162	ycgE	predicted DNA-binding transcriptional regulator	Some information, but not classifiable: Not classified (included putative assignments)
ECK120003211	b1179	ycgL	conserved protein	Unknown proteins, no known homologs: Unknown function
ECK120001471	b1188	ycgB	putative sporulation protein	Some information, but not classifiable: Not classified (included putative assignments)
ECK120001487	b1205	ychH	predicted inner membrane protein	Unknown proteins, no known homologs: Unknown function
ECK120002267	b1220	ychO	predicted invasin	Some information, but not classifiable: Not classified (included putative assignments)
ECK120002022	b1233	ychJ	conserved protein	Unknown proteins, no known homologs: Unknown function
ECK120001555	b1251	yciI	predicted enzyme	Unknown proteins, no known homologs: Unknown function
ECK120001108	b1256	ompW	OmpW, outer membrane protein	Some information, but not classifiable: Not classified (included putative assignments)
ECK120003229	b1266	trpH	conserved protein	Some information, but not classifiable: Not classified (included putative assignments)
ECK120003240	b1298	puuD	&gamma;-glutamyl-&gamma;-aminobutyrate hydrolase	Some information, but not classifiable: Not classified (included putative assignments)
ECK120003256	b1325	ycjG	L-Ala-D/L-Glu epimerase	Unknown proteins, no known homologs: Unknown function
ECK120003261	b1330	ynaI	conserved inner membrane protein	Unknown proteins, no known homologs: Unknown function
ECK120001222	b1333	uspE	universal stress protein with a role in resistance to UV irradiation	Unknown proteins, no known homologs: Unknown function
ECK120003269	b1342	ydaN	predicted Zn(II) transporter	Unknown proteins, no known homologs: Unknown function
ECK120003294	b1376	uspF	nucleotide binding filament protein	Unknown proteins, no known homologs: Unknown function
ECK120003339	b1439	ydcR	fused predicted DNA-binding transcriptional regulator and predicted amino transferase	Some information, but not classifiable: Not classified (included putative assignments)
ECK120003352	b1452	yncE	conserved protein	Some information, but not classifiable: Not classified (included putative assignments)
ECK120003354	b1454	yncG	hypothetical GST-like protein	Some information, but not classifiable: Not classified (included putative assignments)
ECK120001587	b1535	ydeH	conserved protein	Unknown proteins, no known homologs: Unknown function
ECK120002220	b1539	ydfG	3-hydroxy acid dehydrogenase monomer	Some information, but not classifiable: Not classified (included putative assignments)
ECK120003403	b1540	ydfH	predicted DNA-binding transcriptional regulator	Some information, but not classifiable: Not classified (included putative assignments)
ECK120003412	b1550	gnsB	Qin prophage; predicted protein	Unknown proteins, no known homologs: Unknown function
ECK120003430	b1583	ynfB	predicted protein	Unknown proteins, no known homologs: Unknown function
ECK120003448	b1601	tqsA	transporter of quorum signal AI-2	Some information, but not classifiable: Not classified (included putative assignments)
ECK120003454	b1614	ydgA	conserved protein	Unknown proteins, no known homologs: Unknown function
ECK120003507	b1696	ydiP	predicted DNA-binding transcriptional regulator	Some information, but not classifiable: Not classified (included putative assignments)
ECK120003519	b1726	yniB	predicted inner membrane protein	Unknown proteins, no known homologs: Unknown function
ECK120003520	b1727	yniC	2-deoxyglucose-6-phosphatase	Unknown proteins, no known homologs: Unknown function
ECK120003540	b1757	ynjE	predicted thiosulfate sulfur transferase	Central intermediary metabolism: Sulfur metabolism
ECK120003556	b1783	yeaG	conserved protein	Unknown proteins, no known homologs: Unknown function
ECK120003562	b1789	yeaL	conserved inner membrane protein	Unknown proteins, no known homologs: Unknown function
ECK120003587	b1824	yobF	predicted protein	Unknown proteins, no known homologs: Unknown function
ECK120003624	b1919	dcyD	D-cysteine desulfhydrase monomer	Some information, but not classifiable: Not classified (included putative assignments)
ECK120001825	b2013	yeeE	putative transport system permease protein	Some information, but not classifiable: Not classified (included putative assignments)
ECK120003679	b2042	galF	predicted subunit with GalU	Central intermediary metabolism: Sugar-nucleotide biosynthesis, conversions
ECK120003694	b2063	yegH	putative transport protein	Unknown proteins, no known homologs: Unknown function
ECK120003711	b2095	gatZ		Some information, but not classifiable: Not classified (included putative assignments)
ECK120003723	b2146	yeiT	predicted oxidoreductase	Some information, but not classifiable: Not classified (included putative assignments)
ECK120003725	b2175	spr	predicted peptidase, outer membrane lipoprotein	Some information, but not classifiable: Not classified (included putative assignments)
ECK120003738	b2249	yfaY	conserved protein	Unknown proteins, no known homologs: Unknown function
ECK120003789	b2343	yfcZ	conserved protein	Unknown proteins, no known homologs: Unknown function
ECK120003791	b2346	vacJ	predicted lipoprotein	Macromolecule synthesis, modification: Lipoprotein
ECK120002035	b2426	ucpA	predicted oxidoreductase, sulfate metabolism protein	Some information, but not classifiable: Not classified (included putative assignments)
ECK120003883	b2494	yfgC	predicted peptidase	Unknown proteins, no known homologs: Unknown function
ECK120003893	b2513	yfgM	conserved protein	Unknown proteins, no known homologs: Unknown function
ECK120003895	b2520	yfhM	putative lipoprotein	Unknown proteins, no known homologs: Unknown function
ECK120001548	b2521	sseA	3-mercaptopyruvate:cyanide sulfurtransferase	Some information, but not classifiable: Not classified (included putative assignments)
ECK120003899	b2532	trmJ	tRNA:Cm32/Um32 methyltransferase	Unknown proteins, no known homologs: Unknown function
ECK120003967	b2672	ygaM	predicted protein	Unknown proteins, no known homologs: Unknown function
ECK120003972	b2682	ygaZ	predicted transporter	Unknown proteins, no known homologs: Unknown function
ECK120003981	b2735	ygbI	predicted DNA-binding transcriptional regulator, DEOR-type	Some information, but not classifiable: Not classified (included putative assignments)
ECK120001223	b2785	rumA	23S ribosomal RNA 5-methyluridine methyltransferase	Some information, but not classifiable: Not classified (included putative assignments)
ECK120004015	b2794	queF	NADPH-dependent nitrile oxidoreductase monomer	Unknown proteins, no known homologs: Unknown function
ECK120004051	b2869	ygeV	putative transcriptional regulator	Some information, but not classifiable: Not classified (included putative assignments)
ECK120004072	b2897	ygfY	conserved protein	Unknown proteins, no known homologs: Unknown function
ECK120004073	b2898	ygfZ	folate-binding protein	Unknown proteins, no known homologs: Unknown function
ECK120001142	b2923	argO	arginine export protein	Unknown proteins, no known homologs: Unknown function
ECK120001143	b2924	mscS	MscS	Some information, but not classifiable: Not classified (included putative assignments)
ECK120004113	b2989	yghU	glutathione transferase-like protein possibly involved in glutathionylspermidine metabolism	Some information, but not classifiable: Not classified (included putative assignments)
ECK120004114	b2997	hybO	hydrogenase 2, small subunit	Some information, but not classifiable: Not classified (included putative assignments)
ECK120001756	b3009	yghB	conserved inner membrane protein	Unknown proteins, no known homologs: Unknown function
ECK120004124	b3012	dkgA	methylglyoxal reductase/&beta;-keto ester reductase/2,5-diketo-D-gluconate reductase A	Unknown proteins, no known homologs: Unknown function
ECK120004148	b3071	yqjI	predicted transcriptional regulator	Unknown proteins, no known homologs: Unknown function
ECK120004159	b3087	ygjR	predicted NAD(P)-binding dehydrogenase	Unknown proteins, no known homologs: Unknown function
ECK120004201	b3157	yhbT	predicted lipid carrier protein	Unknown proteins, no known homologs: Unknown function
ECK120002385	b3180	yhbY	predicted RNA-binding protein	Unknown proteins, no known homologs: Unknown function
ECK120004228	b3233	yhcB	conserved protein	Unknown proteins, no known homologs: Unknown function
ECK120004260	b3346	yheO	predicted DNA-binding transcriptional regulator	Unknown proteins, no known homologs: Unknown function
ECK120002233	b3355	prkB	predicted phosphoribulokinase	Central intermediary metabolism: Misc. glucose metabolism
ECK120002118	b3499	yhiR	protein involved in utilization of DNA as a carbon source	Unknown proteins, no known homologs: Unknown function
ECK120001451	b3511	hdeD	acid-resistance membrane protein	Unknown proteins, no known homologs: Unknown function
ECK120002154	b3554	yiaF	conserved protein	Unknown proteins, no known homologs: Unknown function
ECK120001698	b3592	yibF	glutathione transferase-like protein possibly involved in selenium metabolism	Some information, but not classifiable: Not classified (included putative assignments)
ECK120002177	b3612	gpmM	phosphoglycerate mutase, cofactor independent	Some information, but not classifiable: Not classified (included putative assignments)
ECK120000004	b3639	dfp		Macromolecule synthesis, modification: DNA - replication, repair, restr./ modification
ECK120001627	b3655	yicH	conserved protein	Unknown proteins, no known homologs: Unknown function
ECK120001650	b3680	yidL	putative ARAC-type regulatory protein	Some information, but not classifiable: Not classified (included putative assignments)
ECK120001670	b3746	ravA	regulatory ATPase	Some information, but not classifiable: Not classified (included putative assignments)
ECK120001429	b3820	yigI	conserved protein	Unknown proteins, no known homologs: Unknown function
ECK120001762	b3858	yihD	conserved protein	Unknown proteins, no known homologs: Unknown function
ECK120001781	b3885	yihX	&alpha;-D-glucose-1-phosphatase	Some information, but not classifiable: Not classified (included putative assignments)
ECK120001361	b3963	fabR	FabR transcriptional dual regulator	Unknown proteins, no known homologs: Unknown function
ECK120001847	b4020	yjbB	predicted transporter	Some information, but not classifiable: Not classified (included putative assignments)
ECK120001863	b4056	yjbQ	conserved protein	Unknown proteins, no known homologs: Unknown function
ECK120002069	b4135	yjdC	predicted transcriptional regulator	Unknown proteins, no known homologs: Unknown function
ECK120004330	b4144	yjeI	conserved protein	Unknown proteins, no known homologs: Unknown function
ECK120001191	b4155	poxA	putative regulator of pyruvate oxidase	Macromolecule synthesis, modification: Amino acyl tRNA syn; tRNA modification
ECK120004348	b4189	yjfO	conserved protein	Unknown proteins, no known homologs: Unknown function
ECK120004359	b4206	ytfB	predicted cell envelope opacity-associated protein	Unknown proteins, no known homologs: Unknown function
ECK120004372	b4243	yjgF	conserved protein	Unknown proteins, no known homologs: Unknown function
ECK120004380	b4255	rraB	ribonuclease E inhibitor protein B	Unknown proteins, no known homologs: Unknown function
