# Supplementary material for: Genome-Wide Identification of Transcription Start Sites, Promoters and Transcription Factor Binding Sites in E. coli
Source: PLoS One. 2009 Oct 19;4(10):e7526. doi: 10.1371/journal.pone.0007526 (PMC2760140; doi:10.1371/journal.pone.0007526)
Supplement: Table S4 — Putative binding sites for 55 transcription factors were searched in the regions from −400 to +200 for each TSS with promoter prediction, using the Matriz-Scan program. (0.16 MB XLS) [file pone.0007526.s010.xls]

## Sheet: Hoja1
Table S4. Putative binding sites for 55 transcription factors were searched in the regionsfrom -400 to +200 for each TSS with promoter prediction, using the Matriz-Scan program.
gene/bnumber/distance to TSS		Transcriptional Factor	strand	initial position	end position	TF sequence binding site	score prediction
pflB|b0903|898	site	AgaR	D	-523	-512	CTTCCGTTTCCT	11.04
qor|b4051|-73	site	AgaR	D	-244	-233	CTTTCTTTTTAT	11.81
rrsC|b3756|-174	site	AgaR	D	-499	-488	CTTCCTTTTTCT	11.14
rrsC|b3756|-292	site	AgaR	D	-381	-370	CTTCCTTTTTCT	11.14
cobB|b1120|83	site	AraC	R	-449	-430	TTGCCGGGAAATTCGATAAG	10.39
flu|b2000|-36	site	AraC	R	-240	-221	CCGGCAGGTAAAGGGTTACA	10.58
gltX|b2400|-33	site	AraC	D	-232	-213	TTAGCGTGTAAAAAGATAAA	10.22
manZ|b1819|-283	site	AraC	R	-274	-255	ACGGCCGGAATAGCCACACG	11.38
metB|b3939|-37	site	AraC	D	-318	-299	TCGGCGTGATAATGCATATA	11.13
rpoE|b2573|106	site	AraC	D	-91	-72	ATAGCGGGATACTGGATAAG	12.37
rpoE|b2573|-149	site	AraC	D	-346	-327	ATAGCGGGATACTGGATAAG	12.37
sodA|b3908|-51	site	AraC	D	-584	-565	ACGGCAGAATAATCCACGAA	10.77
argR|b3237|-27	site	ArcA	D	-373	-348	ACAACATCAATTTGATAACAATTAAT	10.17
cydA|b0733|0	site	ArcA	D	-581	-556	TTATTGAAACATGATTAACATAATTT	12.34
cydA|b0733|-174	site	ArcA	D	-407	-382	TTATTGAAACATGATTAACATAATTT	12.34
feoA|b3408|-105	site	ArcA	D	-392	-367	TATTTATCATTTCATTAACAACTGAA	10.51
lpd|b0116|-195	site	ArcA	D	-238	-213	TTGTTTAAAAATTGTTAACAATTTTG	13.1
lpd|b0116|-299	site	ArcA	D	-134	-109	TTGTTTAAAAATTGTTAACAATTTTG	13.1
lpd|b0116|-50	site	ArcA	D	-383	-358	TTGTTTAAAAATTGTTAACAATTTTG	13.1
ndh|b1109|-33	site	ArcA	D	-215	-190	TTAATAACCATTAATTAACAATTGGT	13.01
ndh|b1109|-59	site	ArcA	D	-189	-164	TTAATAACCATTAATTAACAATTGGT	13.01
pepQ|b3847|-14	site	ArcA	R	-319	-294	TTGTTTGCATATTTTTAACACAAAAT	12.89
ptsG|b1101|34	site	ArcA	R	-445	-420	TTGACAAAACATATGTCACAATATTT	11.02
rluE|b1135|402	site	ArcA	R	-534	-509	CCAATTACAAATCATTAACAAAAAAT	12.94
sodA|b3908|200	site	ArcA	D	-482	-457	TCAATATCATTTAATTAACTATAATG	10.61
sodA|b3908|242	site	ArcA	D	-524	-499	TCAATATCATTTAATTAACTATAATG	10.61
sodA|b3908|-51	site	ArcA	D	-231	-206	TCAATATCATTTAATTAACTATAATG	10.61
nrdA|b2234|-107	site	ArgP	D	-549	-532	GCATTTAACAATAACCGA	13.41
pnp|b3164|784	site	ArgP	R	-306	-289	GAATTTGTCCATATCCGG	11.1
rpmH|b3703|-104	site	ArgP	R	-425	-408	AAATTTTCCAATATGCGG	11.72
rpmH|b3703|-97	site	ArgP	R	-432	-415	AAATTTTCCAATATGCGG	11.72
argR|b3237|-27	site	ArgR	D	-242	-221	CTGACTGTTTGCATAAAAATTC	11.15
carA|b0032|-96	site	ArgR	D	-139	-118	CAAATAAAGTGAGTGAATATTC	15.49
carA|b0032|-96	site	ArgR	R	-150	-129	CACTTTATTTGCATATTAATTC	15.51
carA|b0032|-96	site	ArgR	R	-569	-548	AATATTTTGTGGTTACAAATTA	9.28
gsp|b2988|-89	site	ArgR	R	-207	-186	CATATGAAATGAATAAATATTG	12.93
pabA|b3360|-22	site	ArgR	D	-191	-170	CATATTTTGTGGTTATAATTTC	13.27
pabA|b3360|-22	site	ArgR	R	-202	-181	CACAAAATATGCATAAAAAATC	13.37
rplA|b3984|-241	site	ArgR	D	-108	-87	AAGACAAAGTGGGTAAAATTTC	9.4
sdhC|b0721|-222	site	ArgR	D	-325	-304	CAAATTAGATGATTAAAAATTA	10.49
ybjP|b0865|-31	site	ArgR	D	-93	-72	CAGAAATATTGCATAATTATTC	13.36
ybjP|b0865|-55	site	ArgR	D	-117	-96	CAGAAATATTGCATAATTATTC	13.36
ycjL|b1298|-68	site	ArgR	R	-279	-258	CATTTAGTTTGCATACAGATTC	13.39
cycA|b4208|-84	site	CRP	R	-314	-291	GATAACGCGAAACAGCTCACAAAA	10.57
emrD|b3673|-586	site	CRP	D	-462	-439	AAAATTGAGGGGTTGATCACGTTT	11.78
fabA|b0954|-334	site	CRP	R	-136	-113	AAAAATTTGTTCCTCTTCACATTT	11.72
galP|b2943|-144	site	CRP	R	-138	-115	AAAGATGTGAAGCAAATCACATCA	12.17
gapA|b1779|-174	site	CRP	D	-254	-231	TAAATCGTGATGAAAATCACATTT	12.19
gapA|b1779|-174	site	CRP	R	-252	-229	AAAAATGTGATTTTCATCACGATT	13.02
gapA|b1779|25	site	CRP	D	-453	-430	TAAATCGTGATGAAAATCACATTT	12.19
gapA|b1779|25	site	CRP	R	-451	-428	AAAAATGTGATTTTCATCACGATT	13.02
gapA|b1779|-36	site	CRP	D	-392	-369	TAAATCGTGATGAAAATCACATTT	12.19
gapA|b1779|-36	site	CRP	R	-390	-367	AAAAATGTGATTTTCATCACGATT	13.02
garD|b3128|-75	site	CRP	D	-254	-231	AAATGATTGACATTGATCACATTT	10.8
glyT|b3978|-159	site	CRP	R	-406	-383	TAATTTGTTTTATTGGTCACATTT	10.06
glyT|b3978|-40	site	CRP	R	-525	-502	TAATTTGTTTTATTGGTCACATTT	10.06
gntR|b3438|-27	site	CRP	D	-222	-199	ACAAATTTGAAGTAGCTCACACTT	11.85
gntR|b3438|-27	site	CRP	R	-220	-197	ATAAGTGTGAGCTACTTCAAATTT	10.58
groS|b4142|-40	site	CRP	R	-335	-312	AAAACCCTGATTCACCTCACATTT	10.59
groS|b4142|-72	site	CRP	R	-303	-280	AAAACCCTGATTCACCTCACATTT	10.59
hpt|b0125|-70	site	CRP	D	-279	-256	ACATGTGTGATCGTCATCACAATT	10.79
hpt|b0125|-70	site	CRP	R	-277	-254	CGAATTGTGATGACGATCACACAT	11.57
lysT|b0743|-42	site	CRP	R	-262	-239	AAAATTTCGATGTAGATCACTCAA	10.95
maeB|b2463|-118	site	CRP	R	-128	-105	TAAAAGGTGAGGTAGATCACTAAG	10.46
mtlA|b3599|-92	site	CRP	D	-272	-249	ATTTATGTGATTGATATCACACAA	10.34
mtlA|b3599|-92	site	CRP	D	-389	-366	AAAAATGTGACACTACTCACATTT	13.87
mtlA|b3599|-92	site	CRP	D	-433	-410	TATCTTGTGATTCAGATCACAAAG	10.53
mtlA|b3599|-92	site	CRP	R	-270	-247	TTTTGTGTGATATCAATCACATAA	10.44
mtlA|b3599|-92	site	CRP	R	-387	-364	TTAAATGTGAGTAGTGTCACATTT	10.32
ompW|b1256|-28	site	CRP	D	-340	-317	TAAAAATTGATTTAAATCACATTA	10.93
ompW|b1256|-29	site	CRP	D	-339	-316	TAAAAATTGATTTAAATCACATTA	10.93
pck|b3403|17	site	CRP	D	-459	-436	AGGAATGCGATTCCACTCACAATA	10.26
pck|b3403|-26	site	CRP	D	-416	-393	AGGAATGCGATTCCACTCACAATA	10.26
priA|b3935|-25	site	CRP	D	-199	-176	AAAAATTCAATATTCATCACACTT	10.44
raiA|b2597|-30	site	CRP	D	-253	-230	AATTATGAGATTTTCATCACACAT	11.17
thrU|b3976|-7	site	CRP	R	-273	-250	TAATTTGTTTTATTGGTCACATTT	10.06
tktA|b2935|-74	site	CRP	D	-151	-128	AATTATGTAATATGCATCACGATA	10.2
tktA|b2935|-74	site	CRP	D	-195	-172	TAAGGCGTGTTGTAGATCACAAAT	10.05
tnaC|b3707|-23	site	CRP	D	-273	-250	ACGATTGTGATTCGATTCACATTT	10.53
tnaC|b3707|-24	site	CRP	D	-272	-249	ACGATTGTGATTCGATTCACATTT	10.53
udp|b3831|-35	site	CRP	D	-311	-288	ATTTATGTGATTTGCATCACTTTT	10.04
udp|b3831|-35	site	CRP	R	-309	-286	CCAAAAGTGATGCAAATCACATAA	10.44
valT|b0744|-5	site	CRP	R	-510	-487	AAAATTTCGATGTAGATCACTCAA	10.95
yaiB|b0382|-24	site	CRP	D	-501	-478	AAAGATGTGCGCAAGATCACAAAA	10.75
ycdZ|b1036|0	site	CRP	D	-305	-282	ATAAGTGTGATCTACGTCACTCAT	10.38
ycdZ|b1036|0	site	CRP	R	-303	-280	TTATGAGTGACGTAGATCACACTT	11.39
yecR|b1904|-25	site	CRP	D	-360	-337	CTTTATGTGATACAAATCACATAA	12.35
yecR|b1904|-25	site	CRP	D	-390	-367	TATAATATGACAACCATCACAAAA	10.08
yecR|b1904|-25	site	CRP	R	-358	-335	ATTTATGTGATTTGTATCACATAA	11.23
yedP|b1955|75	site	CRP	D	-398	-375	AGAAATGTGACGCACGTCACCCCT	10.45
yidL|b3680|-2	site	CRP	R	-97	-74	GAAATTCCGCTGGAGATCACATTT	10.04
yohJ|b2141|-21	site	CRP	R	-247	-224	TAAAACGTGCTACCGATCACATTA	11.91
kup|b3747|-213	site	CsgD	R	-222	-205	TCATTATGGCTCACCCTC	12.25
kup|b3747|-57	site	CsgD	R	-378	-361	TCATTATGGCTCACCCTC	12.25
yncA|b1448|-27	site	CsgD	R	-587	-570	TTTTCCTCGCTCACCAGC	11.27
yncB|b1449|-28	site	CsgD	D	-504	-487	TTTTCCTCGCTCACCAGC	11.27
cysK|b2414|11	site	CysB	R	-334	-305	GAAGGGAAATAATGACATGCAAGATGGAAT	14.17
cysK|b2414|-31	site	CysB	R	-292	-263	GAAGGGAAATAATGACATGCAAGATGGAAT	14.17
cysK|b2414|-32	site	CysB	R	-291	-262	GAAGGGAAATAATGACATGCAAGATGGAAT	14.17
cysK|b2414|-66	site	CysB	R	-257	-228	GAAGGGAAATAATGACATGCAAGATGGAAT	14.17
sscR|b2765|-23	site	CysB	D	-387	-358	GGATAGCGATAACTAATAACCAAATCGACT	17.44
ucpA|b2426|-41	site	CysB	R	-61	-32	GGAAGTTGAAAAGGGAATAAGAACTTGGTT	13.48
ucpA|b2426|-52	site	CysB	R	-72	-43	GGAAGTTGAAAAGGGAATAAGAACTTGGTT	13.48
yqjK|b3100|-143	site	CysB	D	-338	-309	GGAGCTGGAAGAGGAAAAAGCGAATCTCTT	12.67
adk|b0474|-40	site	CytR	D	-181	-152	CATTTTAAGGGGATTTTCGCAATGCGTATC	12.27
priA|b3935|-25	site	CytR	R	-182	-153	AACGGTTACAGAATTTTCATGAAAAGTGTG	13.84
udp|b3831|-35	site	CytR	D	-290	-261	TTTGGTGGGTAAATTTATGCAACGCATTTG	13.14
yhfC|b3364|-49	site	CytR	D	-274	-245	CTCTTAAAATGCAATTTAGCAACCGATTGC	13.2
yhjE|b3523|-26	site	CytR	D	-343	-314	CACTATTTATAAAATTATGTGAAGCATTTC	13.42
pabA|b3360|-22	site	DeoR	R	-213	-188	TATGCATAAAAAATCACTAAATGGCA	12.08
ycjL|b1298|-68	site	DeoR	D	-55	-30	TCTGCAAGAAAAGTACCTGAATGCCA	13.08
ptsG|b1101|34	site	DgsA	D	-354	-331	TTATTTTACTCTGTGTAATAAATA	17.22
ptsG|b1101|34	site	DgsA	D	-523	-500	TTTTTTTAAAGCTCGTAATTAATG	20.07
mioC|b3742|-21	site	DnaA	D	-201	-182	TACTGTGGATAACTCTGTCA	11.48
nrdA|b2234|-107	site	DnaA	R	-251	-232	GCAAGTGCATAACTTTGTGG	11.41
nrdA|b2234|-107	site	DnaA	R	-263	-244	CTTTGTGGATAACTCAGGAA	15.22
polA|b3863|-27	site	DnaA	R	-313	-294	TCATGTGGATAACTTTGTGC	14.4
rpmH|b3703|-104	site	DnaA	R	-501	-482	TCCTGTGGATAAATCGGGAA	15.78
rpmH|b3703|-97	site	DnaA	R	-508	-489	TCCTGTGGATAAATCGGGAA	15.78
rpsP|b2609|-69	site	DnaA	R	-116	-97	CCTTCTGGATAAACCAGGGC	11.35
pepQ|b3847|-14	site	FadR	D	-357	-332	CAAGGTGATCTGGTCGTACCAGATGA	15.3
ycbZ|b0955|-28	site	FadR	R	-235	-210	TACGCTGAACAAGTCCGATCAGTTCG	17.62
arcA|b4401|-202	site	FhlA	R	-527	-498	ACGGCGGATCGTCACGTCTACAGTACGGTC	11.56
artI|b0863|0	site	FhlA	D	-313	-284	ATCGCGGTACGTCAGGGCAACACTGAGCTG	12.41
recG|b3652|-27	site	FhlA	R	-530	-501	GTTTTCTCCTGTCCCATCAAAATGCAGGTC	11.38
sufE|b1679|-186	site	FhlA	R	-320	-291	ATGTTCACCTGAAACCAAAACACTCCTGTG	11
yrbG|b3196|-62	site	FhlA	R	-171	-142	ACGTCCTTTCTTCAGGTATACTCGCCGGTC	11.11
ackA|b2296|-42	site	Fis	R	-324	-301	ATTTTGCGTAATTTTCAGCCAATG	9.06
acpP|b1094|-257	site	Fis	D	-140	-117	AAAATGCTCATGTTGCGCGCAGTC	9.02
atl|b0454|60	site	Fis	D	-532	-509	CAGATGCTGGTTTCTTGCGCAATG	8.59
brnQ|b0401|-110	site	Fis	D	-409	-386	CGATTGGTGATTTTTTGTTCGCAT	10.55
chaC|b1218|-249	site	Fis	D	-505	-482	CCGCTGTCGATTTTTTACTCATTG	8.77
chaC|b1218|-249	site	Fis	R	-35	-12	TTACTGCTCATTTTGAAACCACTA	8.99
clpB|b2592|-24	site	Fis	R	-154	-131	CGTTCGCTCACTTTTCAGGCAAAA	10.55
cmk|b0910|-38	site	Fis	R	-292	-269	CAGATGGGGATTTATTGCGCAATT	9.26
cspD|b0880|-74	site	Fis	D	-419	-396	TTTTCGCTCATTATTCCACCATTC	9.73
cspD|b0880|-86	site	Fis	D	-431	-408	TTTTCGCTCATTATTCCACCATTC	9.73
dgkA|b4042|-31	site	Fis	D	-265	-242	TATCCGCTCATGTTTCGCGCGGCG	8.5
dsbB|b1185|327	site	Fis	R	-511	-488	CAATTGGACAATTATCGGGCGAAA	8.61
efp|b4147|-43	site	Fis	R	-274	-251	AACTTGCCGATGTTGTGACCGATC	9.02
fimA|b4314|-111	site	Fis	R	-198	-175	ACACTGCACAGTTTTCCCCCAAAA	9.18
fimA|b4314|-117	site	Fis	R	-192	-169	ACACTGCACAGTTTTCCCCCAAAA	9.18
ftsQ|b0093|-18	site	Fis	R	-575	-552	CACTTAGCCATTTTTCAATCAATA	9.22
ftsQ|b0093|-181	site	Fis	R	-412	-389	CACTTAGCCATTTTTCAATCAATA	9.22
ghrB|b3553|-23	site	Fis	R	-267	-244	TGCCAGGTGATTTCTGCATCACCT	8.98
glmM|b3176|-111	site	Fis	D	-249	-226	GTTTTGCTGTTTTTTTCCGCAGTT	8.97
glyT|b3978|-159	site	Fis	R	-415	-392	TTATTGGTCACATTTTATGCGACA	8.72
glyT|b3978|-40	site	Fis	R	-534	-511	TTATTGGTCACATTTTATGCGACA	8.72
hfq|b4172|-416	site	Fis	D	-582	-559	CGGCTGCTGATTTTCGCCGCGATG	9.56
hupA|b4000|-105	site	Fis	D	-306	-283	TATTGGTATAATTTTTCAGCAATA	8.9
hupA|b4000|-4	site	Fis	D	-407	-384	TATTGGTATAATTTTTCAGCAATA	8.9
hupA|b4000|-45	site	Fis	D	-366	-343	TATTGGTATAATTTTTCAGCAATA	8.9
hupA|b4000|-52	site	Fis	D	-359	-336	TATTGGTATAATTTTTCAGCAATA	8.9
lon|b0439|-76	site	Fis	D	-325	-302	CATCTGGTGAATAATTAACCATTC	8.83
lon|b0439|-76	site	Fis	R	-324	-301	GGAATGGTTAATTATTCACCAGAT	9.07
mdtL|b3710|-26	site	Fis	D	-479	-456	TGGGCGGTCATTATTCCCGCAGTG	9.07
ndh|b1109|-33	site	Fis	D	-345	-322	AAGTCGCCTATCTTTTCAGCAACA	10.24
ndh|b1109|-33	site	Fis	R	-395	-372	TTATTGTTTATTATTTGAGCGAAT	10.12
ndh|b1109|-59	site	Fis	D	-319	-296	AAGTCGCCTATCTTTTCAGCAACA	10.24
ndh|b1109|-59	site	Fis	R	-369	-346	TTATTGTTTATTATTTGAGCGAAT	10.12
nirB|b3365|-24	site	Fis	D	-354	-331	ATTTTGTCTATTTTTTGCACAAAC	9.53
nirB|b3365|-24	site	Fis	R	-189	-166	ACTTTGCTCATTTTTGCCTCGATT	10.33
nrdA|b2234|-107	site	Fis	D	-495	-472	CATTCGCTTATATATTGACCACAA	8.9
pepT|b1127|588	site	Fis	R	-357	-334	AGCGCGGTCATGATTTCTGCAATA	8.66
rlmF|b0807|-19	site	Fis	D	-372	-349	GATGTGCTTATTTTTTGAACGATA	9.6
rplA|b3984|-241	site	Fis	R	-159	-136	TACCAGCCGCTTTTTTCAGCAGAA	8.65
rpoB|b3987|-429	site	Fis	D	-52	-29	TGGCTGGTGACTTTTTAGTCACCA	10.24
rrsC|b3756|-174	site	Fis	R	-400	-377	TGACCGCGCATTTTTTCAGCAAAA	11.84
rrsC|b3756|-292	site	Fis	R	-282	-259	TGACCGCGCATTTTTTCAGCAAAA	11.84
rrsH|b0201|-286	site	Fis	R	-282	-259	CAACCGCTCATCTTTTAATCATTG	9.24
rrsH|b0201|-34	site	Fis	R	-534	-511	CAACCGCTCATCTTTTAATCATTG	9.24
rsxC|b1629|-292	site	Fis	R	-282	-259	CAACGGTTGATTTTTTCACCGTTA	9.4
sirA|b3470|-22	site	Fis	D	-560	-537	GCAATGGTTAATTTTCACGCAATC	9.75
tatA|b3836|-35	site	Fis	D	-253	-230	AACACGCTGATTTTTTCATCGCTC	10.19
thrU|b3976|-7	site	Fis	R	-282	-259	TTATTGGTCACATTTTATGCGACA	8.72
tsf|b0170|587	site	Fis	R	-413	-390	CGAATGTTGATGTTTTCACCAATT	10.68
yafJ|b0223|-245	site	Fis	R	-557	-534	CGACCGGTCAACTCTTCGGCAAAG	8.83
ybiH|b0796|-24	site	Fis	R	-314	-291	AGTTCGGTCTTTTCTTCATCGAAC	8.87
yccM|b0992|-33	site	Fis	D	-84	-61	AGCTCGGCGATTTTTTGCGCGATA	11.1
yccM|b0992|-33	site	Fis	R	-541	-518	TGATGGGCAATTTTTTGCGCATTT	8.7
yciY|b4595|-25	site	Fis	R	-221	-198	AGAATGGTCATTATACCCCCACCC	8.61
yeaL|b1789|-29	site	Fis	D	-507	-484	AAACCGCGGATTATTTGCGCATTG	8.83
yfeY|b2432|-261	site	Fis	D	-248	-225	AAACTGGCAACTTTTGAAGCGAAA	8.99
yghZ|b3001|-35	site	Fis	D	-273	-250	TTTTTGCCCAGTTTTTCGTCACTC	10.04
yghZ|b3001|-35	site	Fis	D	-309	-286	CAGTTGGTGTTTTTTTAAGCAAAG	9.62
yhaH|b3103|-41	site	Fis	R	-172	-149	TACCAGTCCATTTTTGCCTCAATT	10.17
yhcB|b3233|-65	site	Fis	R	-284	-261	AGAACGGCCTTTTTTTCGTCAACC	9.42
yhcB|b3233|-9	site	Fis	R	-340	-317	AGAACGGCCTTTTTTTCGTCAACC	9.42
yhjE|b3523|-26	site	Fis	D	-278	-255	TTTTTGCCTGATTTTTGACCATTT	8.8
ypjD|b2611|44	site	Fis	D	-151	-128	CGCATGGCTATTATTTCTGCGGTC	9.03
allR|b0506|-28	site	FlhDC	D	-508	-489	GCTGGGTACTCAGGCCTTTA	11.29
bcr|b2182|42	site	FlhDC	R	-179	-160	ACCGTTTTTTCGGCCGACTG	11.36
rplT|b1716|-44	site	FlhDC	R	-361	-342	AGGCTTTTTTCAGGCCATTG	11.67
rplU|b3186|-66	site	FlhDC	R	-33	-14	TACGGTTTTTCGGGCCTTTA	12.53
rpmA|b3185|-102	site	FlhDC	R	-347	-328	TACGGTTTTTCGGGCCTTTA	12.53
rpmA|b3185|-147	site	FlhDC	R	-392	-373	TACGGTTTTTCGGGCCTTTA	12.53
treB|b4240|-27	site	FlhDC	R	-269	-250	GGCGGTATTTCCGCTGATAG	11.78
ybaY|b0453|-73	site	FlhDC	R	-263	-244	GCCCGTAATTCAGACCATTG	11.28
yecR|b1904|-25	site	FlhDC	D	-249	-230	GGCGTCTTTTCCGGCCATTG	15.84
apt|b0469|-102	site	FNR	R	-276	-257	CTTTTCTTGCTTTTCATCAA	9.35
argR|b3237|-27	site	FNR	D	-368	-349	ATCAATTTGATAACAATTAA	10.11
cydA|b0733|0	site	FNR	D	-502	-483	GATAAATTGTTCTCGATCAA	10.72
cydA|b0733|0	site	FNR	D	-554	-535	TAGGAATTGATATTTATCAA	10.75
cydA|b0733|0	site	FNR	R	-548	-529	TATACATTGATAAATATCAA	10.93
cydA|b0733|-174	site	FNR	D	-328	-309	GATAAATTGTTCTCGATCAA	10.72
cydA|b0733|-174	site	FNR	D	-380	-361	TAGGAATTGATATTTATCAA	10.75
cydA|b0733|-174	site	FNR	R	-374	-355	TATACATTGATAAATATCAA	10.93
dbpA|b1343|-228	site	FNR	R	-403	-384	AGTTTATTGACTTCGCTCAA	9.66
menA|b3930|-53	site	FNR	R	-252	-233	TGTTAATTGATATTTGTCAG	9.12
moaA|b0781|-131	site	FNR	R	-332	-313	TTTACTTTGATATACATCAT	10.5
narK|b1223|-25	site	FNR	D	-254	-235	TATCGTTTGATTTACATCAA	9.9
narK|b1223|-25	site	FNR	R	-248	-229	GGCAATTTGATGTAAATCAA	12.1
ndh|b1109|-33	site	FNR	D	-323	-304	CAAAACTTGATTAACATCAA	9.86
ndh|b1109|-59	site	FNR	D	-297	-278	CAAAACTTGATTAACATCAA	9.86
nirB|b3365|-24	site	FNR	D	-254	-235	GTGAATTTGATTTACATCAA	11.36
nirB|b3365|-24	site	FNR	R	-248	-229	CGCTTATTGATGTAAATCAA	12.08
ompW|b1256|-28	site	FNR	D	-340	-321	TAAAAATTGATTTAAATCAC	10.98
ompW|b1256|-28	site	FNR	R	-334	-315	GTTAATGTGATTTAAATCAA	10.75
ompW|b1256|-29	site	FNR	D	-339	-320	TAAAAATTGATTTAAATCAC	10.98
ompW|b1256|-29	site	FNR	R	-333	-314	GTTAATGTGATTTAAATCAA	10.75
ribB|b3041|-252	site	FNR	D	-319	-300	TTCTTTTTCATTATGATCAA	9.5
ribB|b3041|-36	site	FNR	D	-103	-84	TTCTTTTTCATTATGATCAA	9.5
yaiE|b0391|-26	site	FNR	R	-430	-411	GATTTTTTGTTCTGAATCAT	9.24
yaiE|b0391|-29	site	FNR	R	-427	-408	GATTTTTTGTTCTGAATCAT	9.24
ygaM|b2672|-13	site	FNR	R	-120	-101	AGCTAATTGATTGACATCAT	9.09
ygaM|b2672|-15	site	FNR	R	-118	-99	AGCTAATTGATTGACATCAT	9.09
fecI|b4293|-27	site	FruR	D	-377	-356	AACACGTGAAGCGTTTCTGCTT	12.14
gpmM|b3612|-28	site	FruR	D	-240	-219	GGCTATTTTATCGATTCAGCTG	14.48
hscA|b2526|-55	site	FruR	R	-186	-165	GCGTCGAGAATGGTTTCACCGC	11.08
mtlA|b3599|-92	site	FruR	D	-235	-214	GGACAGTTAACCGATTCAGTGC	12.74
nirB|b3365|-24	site	FruR	R	-225	-204	GCCTACCTTAACGATTCAGCAA	13.42
pck|b3403|17	site	FruR	R	-505	-484	CGGTAAAGTATCGATTCACCAC	12.74
pck|b3403|-26	site	FruR	R	-462	-441	CGGTAAAGTATCGATTCACCAC	12.74
pfkA|b3916|-22	site	FruR	D	-303	-282	CTGACCTGAATCAATTCAGCAG	13.14
pfkA|b3916|-78	site	FruR	D	-247	-226	CTGACCTGAATCAATTCAGCAG	13.14
potD|b1123|238	site	FruR	R	-59	-38	CCATTTTTAATGGTTTCAGCAT	11.1
pykF|b1676|-78	site	FruR	D	-347	-326	GACTCTTGAATGGTTTCAGCAC	15.09
rluE|b1135|402	site	FruR	D	-396	-375	ACCAGGTTAAGCGATTCAGCTC	16.21
galM|b0756|-127	site	Fur	D	-170	-153	TAATGAGAATTATTATCA	14.12
galM|b0756|-127	site	Fur	R	-167	-150	TAATGATAATAATTCTCA	15.52
galM|b0756|-209	site	Fur	D	-252	-235	TAATGAGAATTATTATCA	14.12
galM|b0756|-209	site	Fur	R	-249	-232	TAATGATAATAATTCTCA	15.52
lysP|b2156|-27	site	Fur	R	-129	-112	AAACGATAACAATTATCA	12.57
purR|b1658|-156	site	Fur	D	-258	-241	TAATGATAAGTGTTTTTA	12.01
sodA|b3908|200	site	Fur	D	-497	-480	CATTGATAATCATTTTCA	13.75
sodA|b3908|242	site	Fur	D	-539	-522	CATTGATAATCATTTTCA	13.75
sodA|b3908|-51	site	Fur	D	-246	-229	CATTGATAATCATTTTCA	13.75
yjjZ|b4567|-139	site	Fur	D	-119	-102	AAATGATAAAAATTATCA	13.71
yjjZ|b4567|-139	site	Fur	R	-99	-82	TAATGATAACCAATATCA	12.82
exbB|b3006|-32	site	GalR	R	-413	-392	ACCGCAGGAATCGCTGCCACGA	12.05
galM|b0756|-127	site	GalR	R	-75	-54	ACCGGTGAAACGGTTTTCTTTG	11.25
galM|b0756|-209	site	GalR	R	-157	-136	ACCGGTGAAACGGTTTTCTTTG	11.25
galP|b2943|-144	site	GalR	D	-158	-137	GTTAGTGTAAGCGATTACACTG	13.09
galP|b2943|-144	site	GalR	R	-156	-135	ATCAGTGTAATCGCTTACACTA	18.83
gltD|b3213|-59	site	GalR	D	-504	-483	ACGGGTGGTATCGTCTGCATTC	11.94
rplV|b3315|-158	site	GalR	D	-151	-130	ATCCGTGTAACCATTCACACTG	12.8
rpsC|b3314|342	site	GalR	D	-370	-349	ATCCGTGTAACCATTCACACTG	12.8
rpsS|b3316|-470	site	GalR	D	-116	-95	ATCCGTGTAACCATTCACACTG	12.8
yajC|b0407|-83	site	GalR	R	-92	-71	GCCGGTGCACCCGTTGCCGCTA	11.09
yigA|b3810|586	site	GalR	D	-250	-229	AGCGGTGGGATCGGTGGCGATG	11.5
aceE|b0114|355	site	GalS	R	-419	-396	CTGCGGCTACGTTTACACCGCCTT	11.82
galP|b2943|-144	site	GalS	D	-156	-133	TAGTGTAAGCGATTACACTGATGT	20.26
galP|b2943|-144	site	GalS	R	-160	-137	CAGTGTAATCGCTTACACTAACAT	11.42
rplV|b3315|-158	site	GalS	R	-153	-130	CAGTGTGAATGGTTACACGGATGC	11.5
rplV|b3315|-158	site	GalS	R	-267	-244	GGTTGTCAGCGAATTCTTTGGTGT	11.03
rpsC|b3314|342	site	GalS	R	-372	-349	CAGTGTGAATGGTTACACGGATGC	11.5
rpsC|b3314|342	site	GalS	R	-486	-463	GGTTGTCAGCGAATTCTTTGGTGT	11.03
rpsS|b3316|-470	site	GalS	R	-118	-95	CAGTGTGAATGGTTACACGGATGC	11.5
rpsS|b3316|-470	site	GalS	R	-232	-209	GGTTGTCAGCGAATTCTTTGGTGT	11.03
gcvB|b4443|2	site	GcvA	D	-260	-231	TCTGAGCCATTATAAATTGTCCGTTGAGCT	19.44
gcvT|b2905|904	site	GcvA	R	-560	-531	CATAAGGTAAAATTGATCATCACATTAGCT	17.96
acnB|b0118|-96	site	GlpR	R	-201	-178	TAGGGTAAATGCCCAGTACCGCAA	10.94
cspA|b3556|-91	site	GlpR	D	-576	-553	TACCGAAATTGAGCAGTTACGAAA	12.25
dnaB|b4052|-31	site	GlpR	D	-54	-31	GCGGTTTAATGCTAGATAACGAAC	12.1
feoA|b3408|-105	site	GlpR	R	-532	-509	CTACGATTTCGTGCAAATTCGAAC	11.16
frlR|b3375|634	site	GlpR	D	-530	-507	AAGAGAAAGTGATCGAACAGGAAC	9.43
glpD|b3426|-42	site	GlpR	D	-197	-174	GAACATTTATGAGCTTTAACGAAA	10.19
glpD|b3426|-42	site	GlpR	D	-217	-194	TTGCTAATATGTTCGATAACGAAC	15.41
glpD|b3426|-42	site	GlpR	R	-207	-184	GCTCATAAATGTTCGTTATCGAAC	11.32
modA|b0763|-27	site	GlpR	D	-599	-576	GTCTTATTGTGACGGAAAACGAAC	9.54
nmpC|b0553|483	site	GlpR	R	-258	-235	TACCCAATATCAGCGATGCCGAAC	9.73
phoR|b0400|-249	site	GlpR	D	-141	-118	TAACGTGTATGTGGAAGACCGCAC	9.62
pmbA|b4235|515	site	GlpR	R	-428	-405	GAGGTATAACGGGCAATATCCAGC	9.25
proB|b0242|-20	site	GlpR	R	-224	-201	TAGGAAAAATGATATCAAACGAAC	9.28
rplY|b2185|-76	site	GlpR	D	-307	-284	GTGAAAAAGTGTTCGATTACGAAG	9.24
yicN|b3663|-18	site	GlpR	D	-324	-301	TAGGTTTTCTGCGCGAAACCGAAC	10.5
yihV|b3883|-25	site	GlpR	R	-286	-263	TTACAAATACGATCAAAAACAGAC	9.48
yjfO|b4189|5	site	GlpR	D	-83	-60	CCTGCAACATGTGGGGAAACGAAA	9.04
alr|b4053|-130	site	GntR	D	-507	-484	CCTGCAACTGATGCGCGTACCGGC	9.85
chaA|b1216|243	site	GntR	D	-133	-110	ATTGCCTTTATGACGGGTAACGAA	11.87
clcA|b0155|-96	site	GntR	R	-286	-263	ATTTAACTTGTTATGAATAACATA	9.03
fbaA|b2925|11	site	GntR	R	-96	-73	ATTCAATATATTGCAGGATACGTG	9.31
fkpA|b3347|-49	site	GntR	R	-156	-133	CTCATTAATGATGCGGGTAACTAA	9.3
fnr|b1334|-26	site	GntR	D	-255	-232	CTTGCTGGTCATACGCGTAACGTT	9.99
fsaA|b0825|68	site	GntR	D	-43	-20	CGTTCTATTATTGCGGATATCGTG	10.07
gcvH|b2904|-214	site	GntR	D	-433	-410	CATTGTTAGAAGACGAGTAACGGC	9.49
gcvH|b2904|-55	site	GntR	D	-274	-251	CATTGTTAGAAGACGAGTAACGGC	9.49
gntR|b3438|-27	site	GntR	D	-154	-131	CTGGACAATGTTACCGATAACAGT	12.05
gntR|b3438|-27	site	GntR	R	-135	-112	ATTAAAAATGTTACGGGTAACTGT	15.85
yghJ|b4466|2334	site	GntR	D	-517	-494	CATGGTCAGGTTACAGGAAACAGC	9.15
atpH|b3735|-329	site	HipB	R	-404	-387	GGCCGTGAATGCGGATAA	9.45
cyoE|b0428|44	site	HipB	R	-502	-485	AATCCTTAAAGCGGAAAA	9.01
ffh|b2610|-58	site	HipB	R	-30	-13	ATCCTCTTGTGTGAATAA	10.85
hda|b2496|17	site	HipB	R	-147	-130	TTCGCGTAGTTCGGATAA	9.01
hisI|b2026|-385	site	HipB	D	-307	-290	TTCCTTTGGCGCGGATAA	11.5
leuC|b0072|-478	site	HipB	D	-62	-45	ATCCCCTTGCCCGGTCAA	9.59
livJ|b3460|-101	site	HipB	R	-220	-203	ATCTTGTAGGCCGGATAA	9.58
mntH|b2392|122	site	HipB	R	-28	-11	AACGCGTAGGGCGGATAA	10.53
moaA|b0781|-131	site	HipB	R	-446	-429	CTACTGTAGCGCGGATAA	11.34
nudJ|b1134|-262	site	HipB	R	-519	-502	ATCATCTCCAGCGGATAA	9.94
rnhB|b0183|-161	site	HipB	R	-25	-8	AGCTGCGTGTGCGGATAA	9.65
rpoE|b2573|106	site	HipB	R	-46	-29	ATCCATTAAAGCGGAAAG	9.39
rpoE|b2573|-149	site	HipB	R	-301	-284	ATCCATTAAAGCGGAAAG	9.39
rpsP|b2609|-69	site	HipB	R	-538	-521	ATCCTCTTGTGTGAATAA	10.85
sodB|b1656|-53	site	HipB	R	-453	-436	GTCCCTGAGTACGGAAAA	9.14
ydfG|b1539|-26	site	HipB	R	-237	-220	ATGCTTAAGAGCGGGTAA	9.12
yedP|b1955|75	site	HipB	D	-303	-286	ATCCTGGTAAGAGGAGTA	9.2
yghB|b3009|-34	site	HipB	R	-121	-104	ATCCGCCAGCGCGGCAAA	9.12
yobF|b1824|-25	site	HipB	R	-116	-99	ACCCTGGATAGCGGAGAA	10.96
yobF|b1824|-26	site	HipB	R	-117	-100	ACCCTGGATAGCGGAGAA	10.96
proB|b0242|-20	site	IclR	D	-472	-461	TTCATTTTCATT	10.17
proB|b0242|-479	site	IclR	D	-13	-2	TTCATTTTCATT	10.17
purR|b1658|-156	site	IclR	D	-333	-322	TCCTTTTTTATT	10.14
yihV|b3883|-25	site	IclR	R	-215	-204	TTCATTTTAATT	10.22
carA|b0032|-96	site	IHF	D	-522	-505	TAATTTATTGATTATAAA	10.14
chaA|b1216|243	site	IHF	D	-386	-369	TATCTGGTTGATTATCCA	10.01
csrB|b4408|217	site	IHF	R	-461	-444	CAACATTTTGATTTTAAA	9.12
cvrA|b1191|-38	site	IHF	R	-129	-112	TAATTGCCTGATTTTGAT	9.2
dmsA|b0894|1289	site	IHF	D	-41	-24	TAACTGCCTGATTAACCA	9.52
fimA|b4314|-111	site	IHF	D	-440	-423	TAACTGTTTGATATGTAA	10.29
fimA|b4314|-111	site	IHF	D	-568	-551	TAACTTATTGATAATAAA	10.09
fimA|b4314|-117	site	IHF	D	-434	-417	TAACTGTTTGATATGTAA	10.29
fimA|b4314|-117	site	IHF	D	-562	-545	TAACTTATTGATAATAAA	10.09
galF|b2042|-22	site	IHF	R	-111	-94	TAACTCGTTGTTATTCTG	9.16
galF|b2042|-24	site	IHF	R	-113	-96	TAACTCGTTGTTATTCTG	9.16
ndh|b1109|-33	site	IHF	D	-241	-224	TAACCTGTTGTTAATTAA	9.51
ndh|b1109|-59	site	IHF	D	-215	-198	TAACCTGTTGTTAATTAA	9.51
purL|b2557|-46	site	IHF	D	-107	-90	TAACTCATTGATTTTAAT	10.33
rplQ|b3294|-341	site	IHF	R	-193	-176	TAACCTCTTGATATTGCG	9.15
uspF|b1376|-22	site	IHF	R	-41	-24	TAATTTCTTGATTTTGCG	9.86
valV|b1665|-18	site	IHF	R	-318	-301	TATTTTGTTGATTTGCAA	9.06
ycbG|b0956|-26	site	IHF	R	-173	-156	CAAGTTGTTGATATTTCA	9.42
yqcD|b2794|-30	site	IHF	R	-126	-109	TAATCGGTTGATTTTCCA	10.45
ispB|b3187|-74	site	IscR	D	-143	-118	AAAGCCCGGCTTTTGCGATGAATTTA	11.1
malP|b3417|706	site	IscR	D	-477	-452	AAATCACTGCAAAAAGAGTGGGCTAA	10.46
ppk|b2501|-66	site	IscR	R	-489	-464	AATCACCAGCAAATACCGGGACTTTC	10.52
rplU|b3186|240	site	IscR	R	-538	-513	AAAGCCCGGCTTTTGCGATGAATTTA	11.1
smpB|b2620|-64	site	IscR	D	-408	-383	ACAACCCGGCAAAAACTGAGGATAAG	10.79
yjgN|b4257|861	site	IscR	R	-305	-280	TATACAGAACTATCATACGCATTTAA	10.09
yqcD|b2794|-30	site	IscR	D	-502	-477	TATCCCCGGCAAACTGAGTCGTATAA	13.81
apbE|b2214|-237	site	LexA	R	-487	-466	TAAACTGTGGTGACATCCAGGT	10.4
cvpA|b2313|-36	site	LexA	D	-336	-315	AAGACTGGAGCAAATCACAGCT	9.8
dmsA|b0894|1289	site	LexA	R	-40	-19	AATGCTGGTTAATCAGGCAGTT	9.98
emrD|b3673|-586	site	LexA	D	-239	-218	ATTACTGTTTATTTATACAGTA	12.72
emrD|b3673|-586	site	LexA	R	-237	-216	TTTACTGTATAAATAAACAGTA	16.61
fkpA|b3347|-49	site	LexA	D	-330	-309	GCTGCTGGATGTGAAACCAGCG	9.19
ftsK|b0890|-89	site	LexA	R	-207	-186	GTTGCTGTATGGATTAACAGGA	10.83
galE|b0759|-26	site	LexA	D	-499	-478	AAAACTGGCGAACAAGCCAGGC	9.08
glmM|b3176|-111	site	LexA	R	-245	-224	TCAACTGCGGAAAAAAACAGCA	9.44
lexA|b4043|-28	site	LexA	D	-200	-179	ATAACTGTATATACACCCAGGG	16.01
lexA|b4043|-28	site	LexA	D	-221	-200	TTTGCTGTATATACTCACAGCA	16.03
lexA|b4043|-28	site	LexA	R	-260	-239	TAAACTGCACAATAAACCAGAG	12.03
menG|b3929|-27	site	LexA	R	-190	-169	TTTACTGTGTAGGCCAACAGGT	11.05
napG|b2205|-14	site	LexA	D	-500	-479	AAAACTGTCTCAACTTTCAGGG	9.7
nuoC|b2286|-296	site	LexA	D	-161	-140	AAAGCTGAACATCAAACCAGGG	9.36
nuoE|b2285|-84	site	LexA	D	-452	-431	AAAGCTGAACATCAAACCAGGG	9.36
nuoG|b2283|779	site	LexA	R	-243	-222	TTTGCTGTCGTAATAAGCAGGA	10.2
pflB|b0903|898	site	LexA	R	-132	-111	TGTACTGTTTAGCCAGCCAGTC	9.9
pyrC|b1062|-39	site	LexA	D	-206	-185	TTACCTGTATAAATAACCAGTA	12.04
pyrC|b1062|-39	site	LexA	R	-204	-183	TATACTGGTTATTTATACAGGT	11.46
rraA|b3929|-2	site	LexA	R	-165	-144	TTTACTGTGTAGGCCAACAGGT	11.05
rraA|b3929|-21	site	LexA	R	-184	-163	TTTACTGTGTAGGCCAACAGGT	11.05
rraA|b3929|-27	site	LexA	R	-190	-169	TTTACTGTGTAGGCCAACAGGT	11.05
secA|b0098|2126	site	LexA	D	-503	-482	TAAACTGGGTATGAAGCCAGGC	10.84
spr|b4043|-169	site	LexA	D	-59	-38	ATAACTGTATATACACCCAGGG	16.01
spr|b4043|-169	site	LexA	D	-80	-59	TTTGCTGTATATACTCACAGCA	16.03
spr|b4043|-169	site	LexA	R	-119	-98	TAAACTGCACAATAAACCAGAG	12.03
yhhN|b3468|23	site	LexA	R	-145	-124	TTAACGGTTTAAACACCCAGCG	9.29
yhhN|b3468|86	site	LexA	R	-208	-187	TTAACGGTTTAAACACCCAGCG	9.29
yidA|b3697|-24	site	LexA	D	-171	-150	TTTACTGCATATACAACCAGAA	14.95
atpB|b3738|-128	site	Lrp	D	-487	-472	GCTGATTTTCATTCTG	9.11
atpB|b3738|-215	site	Lrp	D	-574	-559	GCTGATTTTCATTCTG	9.11
atpB|b3738|-221	site	Lrp	D	-580	-565	GCTGATTTTCATTCTG	9.11
dadA|b1189|-1	site	Lrp	D	-389	-374	ACGGAATTTTATGCTG	10.1
frlR|b3375|634	site	Lrp	R	-186	-171	CCGGTTTGTCATTCTG	9.7
glyT|b3978|-159	site	Lrp	R	-74	-59	CCTGATTTTCATTCTG	9.11
glyT|b3978|-40	site	Lrp	R	-193	-178	CCTGATTTTCATTCTG	9.11
hda|b2496|17	site	Lrp	D	-318	-303	GGGGCGTTTCTTGCTG	9.04
pepT|b1127|588	site	Lrp	R	-320	-305	GCGGAATTTTTTTCTG	10.01
pta|b2297|338	site	Lrp	D	-533	-518	CCGTATTATTATGCTG	9.03
pykA|b1854|-104	site	Lrp	D	-160	-145	GCGTTATTTCATTCGG	9.81
raiA|b2597|-30	site	Lrp	D	-403	-388	CCGTTTTTTTATTCTG	10.43
yhhK|b3459|-26	site	Lrp	R	-380	-365	CCGTTATTTTATGCTG	10.86
yoaF|b1793|-24	site	Lrp	D	-156	-141	GTGGTGTTTTTTGCTG	9.02
fnr|b1334|237	site	MalT	D	-172	-153	GCCCAACGCGGCTTCTCCCC	11.18
fnr|b1334|-26	site	MalT	D	-435	-416	GCCCAACGCGGCTTCTCCCC	11.18
uspA|b3495|-125	site	MalT	D	-474	-455	GCTTATCATACCTCCTCCCC	11.3
uspA|b3495|-128	site	MalT	D	-471	-452	GCTTATCATACCTCCTCCCC	11.3
yhiI|b3487|-202	site	MalT	R	-475	-456	CCGCACCCACGCTACGCCCG	11.75
cca|b3056|-28	site	MarA	D	-485	-464	GCAAAAAGTGGCGCAGAGCGAC	10.25
glpQ|b2239|-346	site	MarA	R	-171	-150	GAAACGTGTCGTATTAATGAAT	11.06
glpQ|b2239|-479	site	MarA	R	-304	-283	GAAACGTGTCGTATTAATGAAT	11.06
glpQ|b2239|-558	site	MarA	R	-383	-362	GAAACGTGTCGTATTAATGAAT	11.06
nagK|b1119|-167	site	MarA	R	-473	-452	GAAACAGGCCACGCCAATCACC	10.09
rssA|b1234|-196	site	MarA	R	-411	-390	AAAACAGGTGCAATAATTGAAC	10.05
ychJ|b1233|-46	site	MarA	D	-392	-371	AAAACAGGTGCAATAATTGAAC	10.05
yfeY|b2432|-261	site	MarA	R	-414	-393	GCAATCCGTGGCATTGTTGAGC	10.26
anmK|b1640|-165	site	MelR	D	-372	-351	ACCCGTGATATCAGAGTTAACT	9.42
dapE|b2472|-85	site	MelR	R	-199	-178	TACCGGGCACGCAGAGCAATGG	10.12
fbp|b4232|-37	site	MelR	D	-334	-313	TCCCGGAAACCCTGCACCAGCG	9.88
lepA|b2569|-85	site	MelR	R	-81	-60	TACCGGAAAAACAGAAGCACCG	12.67
mtgA|b3208|114	site	MelR	R	-444	-423	TCCCATAAAAAGAGATTTTTGG	12.24
murI|b3967|178	site	MelR	R	-67	-46	AACCGGGAAGTCGAACTTTTCG	9.62
pal|b0741|-105	site	MelR	D	-536	-515	TCCCGGATAGCCAGAACCTGGC	10.47
proA|b0243|-384	site	MelR	D	-142	-121	AACCGTAAACGCTGGATTTTCG	9.85
pta|b2297|-601	site	MelR	R	-562	-541	ACCCTGAATAACAGACTCATCG	11.04
rpoS|b2741|-565	site	MelR	D	-178	-157	AACCAGAATGCCAGCACCAGCG	9.15
rrsH|b0201|-286	site	MelR	R	-147	-126	ACCCTGAATTTCAGGATTTTTC	9.69
rrsH|b0201|-34	site	MelR	R	-399	-378	ACCCTGAATTTCAGGATTTTTC	9.69
sdhD|b0722|-153	site	MelR	R	-254	-233	GCCCATAATCGCGGAAGCTTGC	9.4
sscR|b2765|-23	site	MelR	R	-233	-212	TACCGGAAAGGCTGTTTTTTCG	11.71
sscR|b2765|-23	site	MelR	R	-546	-525	TCCGTTGAACCCGGAGCAACTG	9
uspA|b3495|-125	site	MelR	D	-39	-18	TCCCCGGAAAGCAAAGTTCTGG	9.65
uspA|b3495|-128	site	MelR	D	-36	-15	TCCCCGGAAAGCAAAGTTCTGG	9.65
uspG|b0607|-36	site	MelR	D	-583	-562	GCCCAGGATGACGGAGTTATTC	9.17
ybiH|b0796|-24	site	MelR	R	-94	-73	ACACGGAAACTAAGATTTACCG	10.55
yfhM|b2520|-38	site	MelR	D	-533	-512	AACTGGAAAACCAGAATCTGGC	10.85
yfhM|b2520|-39	site	MelR	D	-534	-513	AACTGGAAAACCAGAATCTGGC	10.85
cbl|b1987|-151	site	MetJ	R	-223	-200	AAAGATTTTTCGCCGTTAAGATGT	10.34
clpB|b2592|-24	site	MetJ	D	-458	-435	ACGTCTGTACAAACGTCTGGAAGA	9.27
gmhB|b0200|-27	site	MetJ	D	-280	-257	TAAGGCATCCAGACGTCTAAATCA	10.06
gmhB|b0200|-27	site	MetJ	D	-288	-265	ATGGATGTTAAGGCATCCAGACGT	14.61
insH-1|b0259|983	site	MetJ	D	-432	-409	CTAAACGTATGGACATCTAAACAT	12.66
insH-1|b0259|983	site	MetJ	D	-440	-417	ATAACCTTCTAAACGTATGGACAT	9.72
insH-1|b0259|983	site	MetJ	R	-428	-405	TTGGATGTTTAGATGTCCATACGT	16.04
insH-1|b0259|983	site	MetJ	R	-436	-413	TTAGATGTCCATACGTTTAGAAGG	11.65
metB|b3939|-37	site	MetJ	D	-252	-229	TTAGATGTCCAGATGTATTGACGT	14.6
metB|b3939|-37	site	MetJ	D	-260	-237	AAAGAAGTTTAGATGTCCAGATGT	15.86
metB|b3939|-37	site	MetJ	D	-268	-245	CTATACGCAAAGAAGTTTAGATGT	12.2
metB|b3939|-37	site	MetJ	R	-248	-225	ATGGACGTCAATACATCTGGACAT	13.19
metB|b3939|-37	site	MetJ	R	-256	-233	CAATACATCTGGACATCTAAACTT	11.57
metE|b3829|208	site	MetJ	D	-583	-560	ATGGATGTGTAAACATCTGGACGG	11.35
metE|b3829|208	site	MetJ	R	-571	-548	GAAGGATTTTAGCCGTCCAGATGT	11.97
metE|b3829|208	site	MetJ	R	-579	-556	TTAGCCGTCCAGATGTTTACACAT	10.15
metE|b3829|208	site	MetJ	R	-587	-564	CCAGATGTTTACACATCCATAATT	10.55
moeA|b0827|-30	site	MetJ	D	-446	-423	AAAAACGCCAGGACGTCTTGATTT	10.72
moeA|b0827|-30	site	MetJ	R	-442	-419	CTGGAAATCAAGACGTCCTGGCGT	10.1
pntB|b1602|10	site	MetJ	R	-520	-497	TCAGCCAGCAATACGTTCATATGT	10.35
queA|b0405|-25	site	MetJ	D	-428	-405	TTGTCAGTCAATACGTCGATACGT	9.83
queA|b0405|-25	site	MetJ	R	-416	-393	TCATATGCATCGACGTATCGACGT	12.27
queA|b0405|-25	site	MetJ	R	-424	-401	ATCGACGTATCGACGTATTGACTG	9.27
tyrR|b1323|1088	site	MetJ	R	-215	-192	TTGAGCGTCAACACGTTCAGACGA	9.07
carA|b0032|693	site	MetR	R	-42	-17	CGCCGTGGTGACCAAATTTCATTTTG	10.11
purR|b1658|-156	site	MetR	D	-288	-263	CACTGTGATGAAAAAATCTCCCGTCA	10.01
rhlB|b3780|0	site	MetR	D	-497	-472	GGCAGTGACGCACGTCTTTAACTACG	10.92
rplE|b3308|80	site	MetR	D	-591	-566	TTCTGTCATGCAAGTCCCTCGGGTCG	11.74
talB|b0008|-35	site	MetR	R	-182	-157	GTCCGTCATGATAGTATTTCTCTTTA	13.04
talB|b0008|-45	site	MetR	R	-172	-147	GTCCGTCATGATAGTATTTCTCTTTA	13.04
talB|b0008|-47	site	MetR	R	-170	-145	GTCCGTCATGATAGTATTTCTCTTTA	13.04
moaA|b0781|-131	site	ModE	D	-268	-243	CGCTATATACATGATTACATAGCGAA	18.15
modA|b0763|-27	site	ModE	R	-218	-193	CGTTATGTAGGCGACAATATAACGAC	14.2
acpP|b1094|-257	site	Nac	D	-488	-469	TCACTATCGGTTCTGTGGTT	10.35
acpP|b1094|-411	site	Nac	D	-334	-315	TCACTATCGGTTCTGTGGTT	10.35
gabD|b2661|-118	site	Nac	R	-240	-221	TAGGAATTGCTGATGTCGCT	11.08
gdhA|b1761|-12	site	Nac	D	-349	-330	TCGCATTTGGTTATGAGATT	11.97
gdhA|b1761|-12	site	Nac	R	-233	-214	ACGATTGTGCTTATGTTGTT	11.16
gdhA|b1761|-63	site	Nac	D	-298	-279	TCGCATTTGGTTATGAGATT	11.97
gdhA|b1761|-63	site	Nac	R	-182	-163	ACGATTGTGCTTATGTTGTT	11.16
feoA|b3408|-105	site	NagC	R	-338	-313	GAAAATATAATTCGAATAGTGAATTA	13.97
galP|b2943|-144	site	NagC	R	-93	-68	ATATGGTTATTTTTTATTGTGAATTA	12.12
nagB|b0678|745	site	NagC	D	-469	-444	GAAAATTTAATTCGTATCGCAAATTA	14.47
nagB|b0678|745	site	NagC	R	-368	-343	GACCTGATTTTTTGAATGATAAAATA	16.73
nagE|b0679|112	site	NagC	D	-557	-532	GACCTGATTTTTTGAATGATAAAATA	16.73
nagE|b0679|112	site	NagC	R	-456	-431	GAAAATTTAATTCGTATCGCAAATTA	14.47
osmE|b1739|-27	site	NagC	D	-163	-138	GAGTTCTTAATTATCTTCGCGAATTA	14.9
ybjM|b0848|-201	site	NagC	D	-547	-522	TAGGTAATTTTTCCCATCGCGAAAAA	11.25
nirB|b3365|-24	site	NarL	D	-278	-261	ATACCCATTAAGGAGTAT	10.39
nirB|b3365|-24	site	NarL	R	-278	-261	ATACTCCTTAATGGGTAT	9.69
queA|b0405|-25	site	NarL	D	-257	-240	CTATCCAAAAGGGGGTAA	9.07
aceF|b0115|-370	site	NarP	R	-49	-32	GTACCCAGTACGCGGTAG	13.4
gadB|b1493|-28	site	NarP	R	-93	-76	ATCCCCCTAAAACGGTAT	11.95
kup|b3747|-57	site	NarP	R	-84	-67	GTACCAATATCGCCGTAG	10.02
moaA|b0781|-131	site	NarP	R	-368	-351	ATCGTCCTTTAGAGGTAG	11.06
modA|b0763|-27	site	NarP	D	-264	-247	CTACCTCACAAAGGTTAG	10.71
nirB|b3365|-24	site	NarP	D	-278	-261	ATACCCATTAAGGAGTAT	15.52
nirB|b3365|-24	site	NarP	R	-278	-261	ATACTCCTTAATGGGTAT	12.31
yecR|b1904|-25	site	NarP	D	-336	-319	ATACCCCTTTAATGTTAT	11.02
yjeA|b4155|-25	site	NarP	R	-415	-398	GTACCTATAAAGGAGCAG	10.13
bioF|b0776|-262	site	NtrC	D	-246	-227	ATTCGCACCATTGCGGTCGC	9.07
dctA|b3528|539	site	NtrC	R	-311	-292	AGTTGCACCAGTGTGCCGAC	9.09
dfp|b3639|-30	site	NtrC	D	-91	-72	GTTTGCGCGATCGCGGGGCC	11.62
dps|b0812|-38	site	NtrC	D	-23	-4	GAGTGCACAATTTTAGCGCA	12.62
dsbB|b1185|327	site	NtrC	D	-476	-457	TGCTGCCTCCTGGTGGCGCA	9.11
efp|b4147|-43	site	NtrC	D	-209	-190	ATATGCGCCATTTTGTGGCT	10.97
entF|b0586|17	site	NtrC	D	-513	-494	TGATGCGCTTTGTTGGCGCG	10.49
entH|b0597|-131	site	NtrC	D	-21	-2	GATAACACAATGGTGGCGCA	10.09
entH|b0597|201	site	NtrC	D	-353	-334	GATAACACAATGGTGGCGCA	10.09
erfK|b1990|-204	site	NtrC	D	-154	-135	TAATGAACCATCGTGGTGCA	14.06
fabH|b1091|-369	site	NtrC	D	-510	-491	GACAGCACAATGCTGGTGCA	11.24
fabH|b1091|-369	site	NtrC	R	-507	-488	AATTGCACCAGCATTGTGCT	9.53
gatD|b2091|-409	site	NtrC	R	-587	-568	TTTTGCACAATACCGGGCCA	9.44
glnA|b3870|-72	site	NtrC	D	-27	-8	TAATGCACTAAAATGGTGCA	9.33
glnA|b3870|-72	site	NtrC	R	-24	-5	GGTTGCACCATTTTAGTGCA	16.04
gltD|b3213|1028	site	NtrC	R	-148	-129	GTACGCACCATTTTTACGCC	10.97
gntR|b3438|-27	site	NtrC	D	-586	-567	TATAGCGTGATGGTTGAGCA	9.65
gyrB|b3699|1878	site	NtrC	R	-250	-231	AAACGCACCATGGTGCCGGT	9.73
gyrB|b3699|1909	site	NtrC	R	-219	-200	AAACGCACCATGGTGCCGGT	9.73
hdeB|b3509|-331	site	NtrC	D	-504	-485	AGTTGAGCCATCTTGCTGCT	9.23
hflB|b3178|-43	site	NtrC	D	-278	-259	GGTAACACCATGTCAGAGCA	9.53
ilvY|b3773|-43	site	NtrC	R	-389	-370	TTACGCACCGGTTCGGGGCT	9.77
leuB|b0073|-165	site	NtrC	R	-140	-121	ATACGCGCCATTTCACCGCA	10.34
leuB|b0073|-77	site	NtrC	R	-52	-33	ATACGCGCCATTTCACCGCA	10.34
lnt|b0657|-75	site	NtrC	R	-92	-73	AAATGCACTCTTTTAGTGCT	11.67
menA|b3930|-53	site	NtrC	D	-543	-524	AAAAACACGCTGGTGGTGCG	9.35
menB|b2262|-163	site	NtrC	R	-569	-550	TTTTGCAGCATTTCGCGGCA	10.18
menB|b2262|-166	site	NtrC	R	-572	-553	TTTTGCAGCATTTCGCGGCA	10.18
menB|b2262|-20	site	NtrC	R	-426	-407	TTTTGCAGCATTTCGCGGCA	10.18
mioC|b3742|-21	site	NtrC	D	-438	-419	AGAAGCCCGATCTTTCTGCA	10.34
mipA|b1782|-33	site	NtrC	D	-232	-213	TAATGCATCTTTCCAGGGCA	10.91
mipA|b1782|-33	site	NtrC	R	-177	-158	TATTGCACCACCGTAATGCA	9.33
mipA|b1782|-34	site	NtrC	D	-233	-214	TAATGCATCTTTCCAGGGCA	10.91
mipA|b1782|-34	site	NtrC	R	-178	-159	TATTGCACCACCGTAATGCA	9.33
murE|b0085|-83	site	NtrC	R	-173	-154	TATCGCCCGTTGTCAGCGCA	9.76
ndk|b2518|-49	site	NtrC	R	-575	-556	AGGTGCAGCATTTTGGTGCC	11.68
nudL|b1813|-27	site	NtrC	R	-515	-496	AGTTGCGCCGTTATGGTGCT	10.88
ompA|b0957|-133	site	NtrC	R	-56	-37	GAAAGCGCCATTTTAATGCG	10.55
ompA|b0957|-173	site	NtrC	R	-96	-77	GAAAGCGCCATTTTAATGCG	10.55
pflB|b0903|103	site	NtrC	R	-461	-442	TACTGCACCTTTCTGGTCAC	9.04
pgk|b2926|-237	site	NtrC	D	-405	-386	TTCAGCGCGCTTTTAGAGCA	9.02
pheS|b1714|273	site	NtrC	R	-100	-81	GGATGCACCATCCCGCAGCC	9.99
phoR|b0400|-249	site	NtrC	D	-343	-324	TAATGCGCCGTATTTCGCCA	9.14
priC|b0467|-76	site	NtrC	D	-129	-110	TAACGCGCGATGATGAGGCG	9.82
rnhB|b0183|-161	site	NtrC	D	-329	-310	AAATGCCCGATGGTGGTGGG	11.05
rnhB|b0183|-288	site	NtrC	D	-202	-183	AAATGCCCGATGGTGGTGGG	11.05
rssA|b1234|-196	site	NtrC	R	-208	-189	TACTGCGCTTTTGTGATGCA	9.86
talB|b0008|-35	site	NtrC	R	-550	-531	TTTCGCACCGGATTTGTGCA	9.45
talB|b0008|-45	site	NtrC	R	-540	-521	TTTCGCACCGGATTTGTGCA	9.45
talB|b0008|-47	site	NtrC	R	-538	-519	TTTCGCACCGGATTTGTGCA	9.45
typA|b3871|-234	site	NtrC	D	-137	-118	TTAAGCACCATGTTGGTGCA	16.13
typA|b3871|-234	site	NtrC	R	-166	-147	TGAAGCACTATATTGGTGCA	13.75
typA|b3871|-234	site	NtrC	R	-229	-210	GATAACGCCTTTTAGGGGCA	9.91
ybgS|b0753|-145	site	NtrC	R	-524	-505	GAATGCAGCATTGTGCCGCC	9.61
ybhK|b0780|-20	site	NtrC	D	-179	-160	AAGTGCGCGTTGTTTATGCC	9.08
ycaO|b0905|167	site	NtrC	D	-118	-99	ATCTGCACGCGTTTGCTGCA	9.3
ycfH|b1100|-141	site	NtrC	D	-308	-289	TAAAACGCCATCATGGTGCT	9.35
ycfH|b1100|-25	site	NtrC	D	-424	-405	TAAAACGCCATCATGGTGCT	9.35
ychJ|b1233|-46	site	NtrC	D	-593	-574	TACTGCGCTTTTGTGATGCA	9.86
ydfG|b1539|-26	site	NtrC	D	-436	-417	TTCTGCCCGCTTTTGCTGCA	10.46
ydgC|b1607|-111	site	NtrC	R	-412	-393	AAGCGCATCATTCCGGTGAA	9.36
yeaB|b1813|-339	site	NtrC	R	-203	-184	AGTTGCGCCGTTATGGTGCT	10.88
yeaZ|b1807|-25	site	NtrC	D	-194	-175	AGTCGCACCATGGCGGTTCA	9.97
yfhB|b2560|-43	site	NtrC	R	-82	-63	GATTACCCGATTGTTATGCA	9.39
yfhK|b2556|421	site	NtrC	R	-180	-161	GTATGCATCATTTTAGCCCG	9.08
yfhM|b2520|-38	site	NtrC	D	-507	-488	GGTAGCGCCAGCCTGGAGCA	9.39
yfhM|b2520|-39	site	NtrC	D	-508	-489	GGTAGCGCCAGCCTGGAGCA	9.39
ygdQ|b2832|-195	site	NtrC	R	-473	-454	TATTGCCCGTTAACGGGGCA	9.88
yhbT|b3157|-25	site	NtrC	D	-320	-301	TTACGCATGATGCTGCTGCA	10.67
yhbT|b3157|-92	site	NtrC	D	-387	-368	TTACGCATGATGCTGCTGCA	10.67
yheO|b3346|-66	site	NtrC	D	-565	-546	ATGAGCACCTTTGTGCCGCC	9.49
yheO|b3346|-67	site	NtrC	D	-566	-547	ATGAGCACCTTTGTGCCGCC	9.49
yhiP|b3496|729	site	NtrC	R	-44	-25	TGATGCACGTTGTTGATGGC	9.9
yhjD|b3522|844	site	NtrC	D	-557	-538	AGTCGCGCGATGTCTGGGAA	9.79
yigA|b3810|586	site	NtrC	D	-311	-292	AACAGCACTATCTTGGGCCG	9.04
ynaI|b1330|-51	site	NtrC	R	-542	-523	TAACGCCCACTTTTGCCGCA	9.31
yqeF|b2844|-21	site	NtrC	R	-588	-569	AAATGCGCGAATGCGGGCCA	9.02
asnS|b0930|-53	site	OmpR	R	-148	-125	TGTAATATTCCGTAACAGGATGAT	9.27
asnS|b0930|-59	site	OmpR	R	-154	-131	TGTAATATTCCGTAACAGGATGAT	9.27
deaD|b3162|-114	site	OmpR	R	-295	-272	GTATATATTATTTTACAGATTGTG	11.54
gcvB|b4443|2	site	OmpR	R	-289	-266	AAAACTAATAGGTTACATAGTGTG	9.57
ndh|b1109|-33	site	OmpR	R	-250	-227	ATTAACAACAGGTTACAGCAATGA	9.67
ndh|b1109|-59	site	OmpR	R	-224	-201	ATTAACAACAGGTTACAGCAATGA	9.67
nupX|b2161|846	site	OmpR	D	-323	-300	ATTTATCTTTGGTTTCAGGGTGTT	10.14
rne|b1084|-54	site	OmpR	R	-203	-180	TTTAATATGTTGATTCAAAGATGA	9.26
tnaC|b3707|-23	site	OmpR	D	-180	-157	ATTATGAATATCTTACATATATGT	9.2
tnaC|b3707|-24	site	OmpR	D	-179	-156	ATTATGAATATCTTACATATATGT	9.2
ybeL|b0643|-21	site	OmpR	D	-276	-253	TCATACATTAATTTACAGAGTTTG	11.24
ybeL|b0643|-25	site	OmpR	D	-272	-249	TCATACATTAATTTACAGAGTTTG	11.24
yqjA|b3095|-18	site	OmpR	D	-366	-343	TGTTACAATTAGATTCAATTTGAA	9.6
ahpC|b0605|-24	site	OxyR	D	-271	-242	AGGTAAAACTTATCGATTTGATAATGGAAA	15.56
ahpC|b0605|-24	site	OxyR	D	-509	-480	AGGCATAACCTATCACTGTCATAGGTAAGA	14.91
ahpC|b0605|-24	site	OxyR	R	-506	-477	AGCTCTTACCTATGACAGTGATAGGTTATG	12.73
bioF|b0776|173	site	OxyR	D	-36	-7	AGGCAGTTATTGCCGCGATGATGGCGAAAG	9.7
fimA|b4314|-111	site	OxyR	D	-573	-544	TGATTTAACTTATTGATAATAAAGTTAAAA	9.54
fimA|b4314|-117	site	OxyR	D	-567	-538	TGATTTAACTTATTGATAATAAAGTTAAAA	9.54
fldA|b0684|-56	site	OxyR	D	-217	-188	AGATAATGCCAATCAAAATAATTGCTACAA	16.64
fldA|b0684|-9	site	OxyR	D	-170	-141	AGATAATGCCAATCAAAATAATTGCTACAA	16.64
flu|b2000|-36	site	OxyR	R	-383	-354	CGATATAAACGATCGATAAAATAGATATTG	14.9
livK|b3458|-398	site	OxyR	R	-234	-205	TGGACATACCGATTGCAGAGATGAGTGCAA	10.12
lysP|b2156|-27	site	OxyR	R	-144	-115	CGATAACAATTATCAATCCAAATGTTAAAT	10.95
napG|b2205|-14	site	OxyR	D	-358	-329	CGCCTGTACCGGTTGCGGTAAGTGCGAAAA	10.11
oxyR|b3961|-33	site	OxyR	D	-201	-172	CGCCATGAACTATCGTGGCGATGGAGGATG	16.01
pck|b3403|17	site	OxyR	R	-384	-355	CGGTTGCTATTATCGCAGAAATAGCATTTT	10.11
pck|b3403|-26	site	OxyR	R	-341	-312	CGGTTGCTATTATCGCAGAAATAGCATTTT	10.11
queA|b0405|-25	site	OxyR	R	-50	-21	GGGTTGAGCTTATCAAGTAAATCGGTGAAA	9.6
secB|b3609|-11	site	OxyR	R	-198	-169	AGCCGGCACCGATCACAGTCATTGAAGCAT	10.5
secB|b3609|-74	site	OxyR	R	-261	-232	AGCCGGCACCGATCACAGTCATTGAAGCAT	10.5
tpx|b0605|-34	site	OxyR	D	-261	-232	AGGTAAAACTTATCGATTTGATAATGGAAA	15.56
tpx|b0605|-34	site	OxyR	D	-499	-470	AGGCATAACCTATCACTGTCATAGGTAAGA	14.91
tpx|b0605|-34	site	OxyR	R	-496	-467	AGCTCTTACCTATGACAGTGATAGGTTATG	12.73
yjjZ|b4567|-139	site	OxyR	D	-93	-64	TGGTTATCATTATCAATGAAAGAGATGAAA	9.21
adhP|b1478|-360	site	PhoB	R	-580	-563	GTGACGGAAATCAATCAC	10.02
csrB|b4408|217	site	PhoB	R	-541	-524	CTGTAAGAGATCTCTCAC	9.62
dacC|b0839|-109	site	PhoB	D	-259	-242	CTGGCAAAAAAATGACAC	9.62
dacC|b0839|-92	site	PhoB	D	-276	-259	CTGGCAAAAAAATGACAC	9.62
gatC|b2092|618	site	PhoB	D	-560	-543	CTGGCATATGACCTTCAC	9.2
gcvH|b2904|-55	site	PhoB	R	-442	-425	CTGGCGCATAAATGTCTG	9.28
gcvT|b2905|-108	site	PhoB	R	-82	-65	CTGGCGCATAAATGTCTG	9.28
gcvT|b2905|-81	site	PhoB	R	-55	-38	CTGGCGCATAAATGTCTG	9.28
glmS|b3729|-157	site	PhoB	D	-127	-110	CTTACATATAACTGTCAC	13.38
glmS|b3729|-157	site	PhoB	D	-149	-132	CTGTCATAAAACTGTCAT	15.67
maeB|b2463|-118	site	PhoB	D	-75	-58	CTGACGAAAAATTGTCAC	10.1
motA|b1890|-66	site	PhoB	R	-484	-467	CTGACGTAAAACAGTCGC	11.84
nanA|b3225|-37	site	PhoB	R	-298	-281	CTGGCAGATATTTTTCAT	9.49
pldB|b3825|-33	site	PhoB	R	-233	-216	CTGACACAACGCTGCGAC	9.7
ppc|b3956|417	site	PhoB	D	-103	-86	CTGGCGGAATACTATGAC	9.01
ppc|b3956|493	site	PhoB	D	-27	-10	CTGGCGGAATACTATGAC	9.01
proB|b0242|-20	site	PhoB	R	-386	-369	CTGTAATATATCTTTAAC	9.67
rbsB|b3751|766	site	PhoB	D	-49	-32	GTGACATAAATACGTCAT	10.19
rpoC|b3988|89	site	PhoB	R	-289	-272	CTTTAATAAATCTTTCAC	11.26
rpsD|b3296|-243	site	PhoB	D	-115	-98	CTTGAATAAATCTGGCAT	9.53
rpsD|b3296|-333	site	PhoB	D	-205	-188	CTTGAATAAATCTGGCAT	9.53
sspA|b3229|-145	site	PhoB	D	-164	-147	CTGTCGGCAATCTGGAAC	9.93
tadA|b2559|-214	site	PhoB	R	-103	-86	CTGACGTAAAACAGCGTC	9.73
talB|b0008|-35	site	PhoB	D	-297	-280	GTGTCAGAAATCCGAAAC	9.54
talB|b0008|-45	site	PhoB	D	-287	-270	GTGTCAGAAATCCGAAAC	9.54
talB|b0008|-47	site	PhoB	D	-285	-268	GTGTCAGAAATCCGAAAC	9.54
tnaC|b3707|-23	site	PhoB	D	-169	-152	CTTACATATATGTGTGAC	9.17
tnaC|b3707|-24	site	PhoB	D	-168	-151	CTTACATATATGTGTGAC	9.17
topA|b1274|-67	site	PhoB	D	-362	-345	CTTTCGTCAATCTGGCAA	9.03
yeaL|b1789|-29	site	PhoB	R	-290	-273	CTGTCATCAAACTGCCAT	12.52
yhbT|b3157|-25	site	PhoB	D	-262	-245	CTGAAACCAAACAGACAT	9.45
yhbT|b3157|-92	site	PhoB	D	-329	-312	CTGAAACCAAACAGACAT	9.45
yigZ|b3848|-2	site	PhoB	D	-309	-292	CTGGCAGAAAATTGAAGC	9
yigZ|b3848|-26	site	PhoB	D	-285	-268	CTGGCAGAAAATTGAAGC	9
yigZ|b3848|-34	site	PhoB	D	-277	-260	CTGGCAGAAAATTGAAGC	9
yqeB|b2875|871	site	PhoB	D	-225	-208	CTGGCAGAAATATTACAG	9
yqiA|b3031|-143	site	PhoB	D	-442	-425	CTGCCGCCAGACTGTCAT	10.45
ahpC|b0605|-24	site	PhoP	R	-157	-136	TGGTTTTTAAAAGGTTTAATTT	9.2
dapE|b2472|-85	site	PhoP	D	-597	-576	TTATTTAATAGTTGTTAATTTG	9.74
gpmM|b3612|873	site	PhoP	D	-411	-390	TGGTTTGCAGGCTGCTTATGCT	9.56
lolC|b1116|-23	site	PhoP	D	-418	-397	TAATTTACATGCGGTTGATCCT	9.18
mglB|b2150|881	site	PhoP	R	-578	-557	TTGTTAAGATACTGTGAAATCA	9.36
mgrB|b1826|-26	site	PhoP	D	-437	-416	ATAGTTAGGCGCTGTTTAACTA	10.08
mscS|b2924|-64	site	PhoP	R	-526	-505	TTGGTCAGGATCTGCTTAACCT	11.51
rna|b0611|-31	site	PhoP	D	-56	-35	TTCTTTTGGGTATGTTTATCTG	10.16
slyB|b1641|-124	site	PhoP	D	-217	-196	TTGTTTATAATTGGTTGATCCT	13.49
slyB|b1641|-98	site	PhoP	D	-243	-222	TTGTTTATAATTGGTTGATCCT	13.49
slyB|b1641|-99	site	PhoP	D	-242	-221	TTGTTTATAATTGGTTGATCCT	13.49
sucA|b0726|2815	site	PhoP	R	-220	-199	TTGTGTATCCTTTATTTATTCG	11.18
sucB|b0727|327	site	PhoP	R	-548	-527	TTGTGTATCCTTTATTTATTCG	11.18
sucB|b0727|329	site	PhoP	R	-550	-529	TTGTGTATCCTTTATTTATTCG	11.18
sulA|b0958|-23	site	PhoP	R	-90	-69	TTGTATAAGGTATGTTTAATCT	10.17
tpx|b0605|-34	site	PhoP	R	-147	-126	TGGTTTTTAAAAGGTTTAATTT	9.2
vacJ|b2346|-128	site	PhoP	D	-355	-334	TGATTTAAAAGATATTGATTCT	9.24
ybdG|b0577|-20	site	PhoP	D	-600	-579	TTGTTAAAGCCTTATTTAACCA	9.12
ycbK|b0926|105	site	PhoP	D	-385	-364	TGCTTTACGGGCGGTTAAGGTG	9.18
ycbK|b0926|-52	site	PhoP	D	-228	-207	TGCTTTACGGGCGGTTAAGGTG	9.18
ycbK|b0926|-54	site	PhoP	D	-226	-205	TGCTTTACGGGCGGTTAAGGTG	9.18
ygaU|b2665|-26	site	PhoP	R	-296	-275	CTTTTTAGCATCGGTTTATTCG	10.49
yjbB|b4020|660	site	PhoP	D	-142	-121	TGGGTAGTCTGCTGTTTAAGCT	9.57
yjcO|b4078|-24	site	PhoP	R	-242	-221	ATCTTAACCGTTGGTTAATTTT	9.61
yliJ|b0838|-38	site	PhoP	D	-359	-338	TCATCTACAATTTGTTTAACGT	9.19
yliJ|b0838|-39	site	PhoP	D	-360	-339	TCATCTACAATTTGTTTAACGT	9.19
ynjA|b1753|-204	site	PhoP	D	-87	-66	TTGTCACCGGACTGTTTATTCT	9.48
yohF|b2137|-26	site	PhoP	R	-535	-514	ATGTTTAGCGGCTGTGTAGGCG	10.97
yrbG|b3196|-62	site	PhoP	D	-120	-99	CTGTTAATTGTTGGTTTACTTT	10.23
carA|b0032|-96	site	PurR	R	-343	-324	CTGGAAAACGCTTGCGCAGC	13.89
cobB|b1120|83	site	PurR	R	-230	-211	GACGCAAACGCTCGCGCAGG	11.57
codB|b0336|-38	site	PurR	R	-247	-228	AAAGCAATCGTTTTCGTGGG	14.65
fabI|b1288|240	site	PurR	D	-370	-351	ATGGCAAAAGCTTGCCGCTC	9.68
fabI|b1288|413	site	PurR	D	-197	-178	ATGGCAAAAGCTTGCCGCTC	9.68
fabI|b1288|-79	site	PurR	R	-173	-154	AAGGAAATCGTTATCCTGAC	10.63
fabI|b1288|-82	site	PurR	R	-176	-157	AAGGAAATCGTTATCCTGAC	10.63
fecR|b4292|-75	site	PurR	D	-341	-322	CGCGCAAACGCTTCCCGTTA	9.65
feoB|b3409|284	site	PurR	R	-524	-505	CAGGAAACCGCTTCCACTTC	9.5
fimA|b4314|-111	site	PurR	D	-377	-358	AAAGCTAACGTTTCTGTGGC	10.27
fimA|b4314|-117	site	PurR	D	-371	-352	AAAGCTAACGTTTCTGTGGC	10.27
gatC|b2092|329	site	PurR	R	-116	-97	AAACCAATAGTTTGCGTCGC	9.27
gatC|b2092|-63	site	PurR	R	-508	-489	AAACCAATAGTTTGCGTCGC	9.27
gatC|b2092|72	site	PurR	R	-373	-354	AAACCAATAGTTTGCGTCGC	9.27
gcvT|b2905|904	site	PurR	D	-497	-478	AAAGAGAACGATTGCGTTGG	10.44
glpD|b3426|-42	site	PurR	D	-56	-37	CAGGATCTCGCTTGCGCGAC	10
malP|b3417|706	site	PurR	D	-293	-274	AGATCAAACGTTTGCATGAG	9.85
manA|b1613|-281	site	PurR	R	-212	-193	AGCGAACACGTTAGCGTATC	10.99
oxyR|b3961|-33	site	PurR	R	-359	-340	AACGTGAACTTTTGCGGATC	9.65
oxyR|b3961|-33	site	PurR	R	-475	-456	AAAGCAATCGCCTGCGCCAC	10.23
pgk|b2926|572	site	PurR	R	-469	-450	GAAGCGAACGTTTTCCAGAA	9.38
proX|b2679|319	site	PurR	R	-501	-482	GTGGCAAACGCTGTCGCAAA	10.16
purA|b4177|-23	site	PurR	D	-299	-280	GAGGAAAACGATTGGCTGAA	10.39
purA|b4177|-27	site	PurR	D	-295	-276	GAGGAAAACGATTGGCTGAA	10.39
purM|b2499|-40	site	PurR	R	-242	-223	AAAGCAAACGTTTGCGAGAC	17.04
purR|b1658|-156	site	PurR	D	-105	-86	AAGGCAAACGTTTACCTTGC	13.54
purR|b1658|-156	site	PurR	R	-107	-88	AAGGTAAACGTTTGCCTTTA	15.38
rpmH|b3703|-104	site	PurR	D	-65	-46	AGCGCAACCGTTCTCACGGC	9.37
rpmH|b3703|-97	site	PurR	D	-72	-53	AGCGCAACCGTTCTCACGGC	9.37
rsxC|b1629|-292	site	PurR	D	-92	-73	GACGCCATCGTTGGCGCTAC	9.56
sirA|b3470|-22	site	PurR	R	-547	-528	TAGGTTAACGATTGCGTGAA	9.77
tesA|b0494|-315	site	PurR	R	-182	-163	GCCGAAAAAGTTGGCGGAAA	9.04
tesB|b0452|-40	site	PurR	R	-556	-537	CACGCTACCATTTGCGCGGA	10.77
ubiH|b2907|21	site	PurR	D	-337	-318	GAAGCAACCATTGGCGTCAC	10.35
wzzE|b3785|-167	site	PurR	R	-598	-579	AAAGCACCAGATTGCGAGGC	10.03
yceD|b1088|-145	site	PurR	R	-428	-409	AGCGCAATCTCTGGCGTCAC	9.04
yceD|b1088|-2	site	PurR	R	-571	-552	AGCGCAATCTCTGGCGTCAC	9.04
yfcZ|b2343|-45	site	PurR	D	-410	-391	AGAGCAAACGCTGGCGGCGC	11.86
yfgC|b2494|-68	site	PurR	D	-406	-387	AAGGCAATCGCTTCCGGGTC	13.15
yfhK|b2556|421	site	PurR	D	-147	-128	AAAGCAACAGCTTGCCTGGC	12.45
ygaZ|b2682|-48	site	PurR	D	-271	-252	TCAGCAACCGTTTTCGTGGC	10.31
yhbP|b3154|-58	site	PurR	R	-494	-475	AACGCTACCGTTTTCGGCTG	9.8
yhbY|b3180|-31	site	PurR	D	-270	-251	ATCGTAACCAATTGCGTAAA	9.92
yicE|b3654|-24	site	PurR	D	-147	-128	TGCGCAACCGGTTGCGCAGA	10.08
yicE|b3654|-24	site	PurR	D	-245	-226	GTGGCAAACGTTTGCTTTTC	11.41
yicE|b3654|-24	site	PurR	R	-247	-228	AAAGCAAACGTTTGCCACAT	11.43
yihV|b3883|-25	site	PurR	R	-52	-33	GCCGCAACCGCTGCCGTCGC	9.37
proB|b0242|-20	site	RcsAB	D	-368	-351	ATTAATAATATTCTTAAA	11.83
ychO|b1220|24	site	RcsAB	D	-328	-311	TTTAAGGATTTTCCTGAA	10.61
bioF|b0776|173	site	RhaS	D	-42	-19	CTAATCAGGCAGTTATTGCCGCGA	10.02
cdsA|b0175|204	site	RhaS	R	-295	-272	GTCCCCATTCCCACGCTGCCAGCA	10.97
cpdA|b3032|-88	site	RhaS	D	-186	-163	ATGATCATTCCGCAGTTGCCGCCG	12.19
cycA|b4208|-84	site	RhaS	D	-40	-17	GACATATTCAGCTTATTGCCATTG	11.19
cyoE|b0428|44	site	RhaS	D	-476	-453	GCAAACATTCCGGTATTGCCAGTG	12.83
fabG|b3256|410	site	RhaS	R	-593	-570	GCAATCTCGCCGCGGTTGGCAATA	11.31
fabZ|b0180|-25	site	RhaS	D	-575	-552	GCGACAATACGGCGGTTGCCGGTG	12.95
fecI|b4293|-27	site	RhaS	R	-128	-105	CTGTTCATACCACTGTTGCCAGCG	11.9
fecR|b4292|461	site	RhaS	R	-338	-315	GCCATCTTCCAGTTGCTGACGGCT	11.2
fecR|b4292|461	site	RhaS	R	-590	-567	CTGTTCATACCACTGTTGCCAGCG	11.9
kefB|b3350|1388	site	RhaS	D	-125	-102	GCGTTAGTGCCGTTGTTGGCGGGG	10.26
malT|b3418|1407	site	RhaS	D	-526	-503	TTCATCATGCGCTGGCGGCAGGCG	10.85
moaD|b0784|14	site	RhaS	D	-30	-7	TTGACCATCCGCTGACTGACGGCG	14.68
moaD|b0784|20	site	RhaS	D	-36	-13	TTGACCATCCGCTGACTGACGGCG	14.68
murF|b0086|-203	site	RhaS	R	-63	-40	TAGTCCAGACGCTGATTGCCAACA	10.08
nth|b1633|-430	site	RhaS	D	-167	-144	TTTTTATTCCGCTGATTGTCACTA	10.5
pldB|b3825|-33	site	RhaS	R	-455	-432	TTCATATTGTGCTGGTTGGCGTGG	10.48
prs|b1207|-122	site	RhaS	D	-112	-89	TTACCCGTGACCTGATTGCCGGGA	10.32
prs|b1207|-301	site	RhaS	D	-291	-268	TTACCCGTGACCTGATTGCCGGGA	10.32
rrmJ|b3179|-416	site	RhaS	D	-213	-190	ATCTTCATCTCCTGGTTCCCGATG	10.29
rseP|b0176|-395	site	RhaS	R	-565	-542	GTCCCCATTCCCACGCTGCCAGCA	10.97
selA|b3591|-51	site	RhaS	R	-125	-102	GCGACCATCCGGCTGCGGCCAGTA	12.67
sodA|b3908|200	site	RhaS	R	-582	-559	CACTTAATGCCGTGATTGCCAGTA	15.41
sodA|b3908|-51	site	RhaS	D	-364	-341	TTAACCTTTCGCCTGTTGCCGCCG	16.28
sodA|b3908|-51	site	RhaS	R	-331	-308	CACTTAATGCCGTGATTGCCAGTA	15.41
tesA|b0494|-315	site	RhaS	D	-153	-130	CTCACCATGCGCCTGTTACCCGCG	11.48
xni|b2798|69	site	RhaS	D	-175	-152	CTGTTCATTTGCTTATTGTCGATG	10.39
ybeB|b0637|-18	site	RhaS	R	-26	-3	GTGACAATGCGGTTTTTGCCTGCG	10.91
ybeB|b0637|-36	site	RhaS	R	-44	-21	GTGACAATGCGGTTTTTGCCTGCG	10.91
ygaU|b2665|-26	site	RhaS	D	-452	-429	GGAATATTTCCGGTATTGCCAGTG	12.78
ygfY|b2897|-29	site	RhaS	D	-190	-167	TGATTCATGGGCTGGTTGCCGCTG	10.25
yhjD|b3522|844	site	RhaS	D	-126	-103	TACTTCTTCGCCCGTTTGACGCTG	10.25
yhjD|b3522|844	site	RhaS	D	-306	-283	TGGATCTTCTGGCGGTTGCCGCGC	10.6
yigA|b3810|586	site	RhaS	R	-168	-145	CGTTCCTTGCCCTTGTTGATAGTG	10.12
yjcE|b4065|587	site	RhaS	D	-60	-37	GCATCCTCGCTGCGGTTGCCGCCG	10.37
yjeF|b4167|1113	site	RhaS	R	-534	-511	CCCGCCGTGCCGTGATCGCCACCG	11.09
ypeC|b2390|-468	site	RhaS	D	-175	-152	CCGCCCTGGTCGTTGCTGCCGCCA	10.02
yqeB|b2875|871	site	RhaS	D	-452	-429	ATAATTTTGTCCTGATTGCCACGA	11.57
yraM|b3147|-130	site	RhaS	R	-411	-388	AAAACATTGCGCTGGTTTCCGATG	10.05
yraM|b3147|-16	site	RhaS	R	-525	-502	AAAACATTGCGCTGGTTTCCGATG	10.05
ampC|b4150|-251	site	Rob	D	-254	-231	AAACGTTATCTCGGTACCTGGTAT	10.11
fabH|b1091|-214	site	Rob	R	-401	-378	GAACATCCTGACAACACCTTCCAT	11.09
fabH|b1091|-272	site	Rob	R	-343	-320	GAACATCCTGACAACACCTTCCAT	11.09
fabH|b1091|-369	site	Rob	R	-246	-223	GAACATCCTGACAACACCTTCCAT	11.09
glpQ|b2239|-346	site	Rob	R	-161	-138	GAAAATCTTAATGAAACGTGTCGT	14.61
glpQ|b2239|-479	site	Rob	R	-294	-271	GAAAATCTTAATGAAACGTGTCGT	14.61
glpQ|b2239|-558	site	Rob	R	-373	-350	GAAAATCTTAATGAAACGTGTCGT	14.61
mpl|b4233|-25	site	Rob	D	-362	-339	TAACGTTTTCATAAAACTTTCCCT	11.22
pheS|b1714|273	site	Rob	R	-447	-424	TAGTGTCAAACCAGAAAGTGTCGT	10.93
selA|b3591|-51	site	Rob	R	-491	-468	GAAAGACATGGCATAACCTGTACC	10.01
sodA|b3908|200	site	Rob	R	-510	-487	GATTATCAATGCCGTACTTTTCGT	10.48
sodA|b3908|242	site	Rob	R	-552	-529	GATTATCAATGCCGTACTTTTCGT	10.48
sodA|b3908|-51	site	Rob	R	-259	-236	GATTATCAATGCCGTACTTTTCGT	10.48
yabI|b0065|-81	site	Rob	R	-335	-312	GATCGTCAAAACCAACATTGCGAC	10.26
ydbC|b1406|-32	site	Rob	R	-305	-282	AAGACACAAAACAAAACGCGTCAC	11.14
yobF|b1824|-25	site	Rob	R	-203	-180	GAACCACTTAACCTGACCTTTAAT	10.5
yobF|b1824|-26	site	Rob	R	-204	-181	GAACCACTTAACCTGACCTTTAAT	10.5
glpX|b3925|-24	site	SoxS	R	-221	-200	GGAAGGCTCAATCGATCAAATC	12.92
glpX|b3925|-317	site	SoxS	R	-514	-493	GGAAGGCTCAATCGATCAAATC	12.92
glpX|b3925|-64	site	SoxS	R	-261	-240	GGAAGGCTCAATCGATCAAATC	12.92
manX|b1817|477	site	SoxS	D	-301	-280	TGAAAGCACTGAAAGCCAAACC	10.01
manX|b1817|658	site	SoxS	D	-482	-461	TGAAAGCACTGAAAGCCAAACC	10.01
nfo|b2159|-29	site	SoxS	D	-255	-234	TCATCGCATAAACCACTACATC	10.4
sseA|b2521|-45	site	SoxS	D	-250	-229	TTGTGGCTCAGACAGCCAAATC	10.46
yncE|b1452|63	site	SoxS	D	-437	-416	AAACGGCACAATACGTTAAGTA	11.35
flu|b2000|-36	site	TorR	R	-319	-296	TGTCTTTCTGTACGTATCTGTGCA	11.25
tnaC|b3707|-23	site	TorR	D	-268	-245	TGTGATTCGATTCACATTTAAACA	14.01
tnaC|b3707|-24	site	TorR	D	-267	-244	TGTGATTCGATTCACATTTAAACA	14.01
aroL|b0388|-127	site	TrpR	R	-155	-132	TCATACCATCAAACTAGTACAATT	16.32
aroL|b0388|-53	site	TrpR	R	-229	-206	TCATACCATCAAACTAGTACAATT	16.32
deaD|b3162|-114	site	TrpR	D	-233	-210	TTGTACTCGTGTACTGGTACAGTG	19.3
deaD|b3162|-114	site	TrpR	R	-235	-212	CTGTACCAGTACACGAGTACAAAA	12.89
sapC|b1292|-55	site	TrpR	D	-598	-575	ACGAACTGGAAAAAGAGTACGTTA	12.85
trpH|b1266|-29	site	TrpR	D	-282	-259	GCGTACTAGTTAACTAGTTCGATG	21.24
trpH|b1266|-29	site	TrpR	R	-284	-261	TCGAACTAGTTAACTAGTACGCAA	20.13
yciV|b1266|-32	site	TrpR	D	-279	-256	GCGTACTAGTTAACTAGTTCGATG	21.24
yciV|b1266|-32	site	TrpR	R	-281	-258	TCGAACTAGTTAACTAGTACGCAA	20.13
aroL|b0388|-127	site	TyrR	D	-180	-161	AGTGGAATTTTTTCTTTACA	11.83
aroL|b0388|-127	site	TyrR	D	-203	-184	GGTGTATTGAGATTTTCACT	10.19
aroL|b0388|-127	site	TyrR	D	-256	-237	AATGTAATTTATTATTTACA	11.26
aroL|b0388|-127	site	TyrR	R	-254	-235	AGTGTAAATAATAAATTACA	9.5
aroL|b0388|-53	site	TyrR	D	-254	-235	AGTGGAATTTTTTCTTTACA	11.83
aroL|b0388|-53	site	TyrR	D	-277	-258	GGTGTATTGAGATTTTCACT	10.19
aroL|b0388|-53	site	TyrR	D	-330	-311	AATGTAATTTATTATTTACA	11.26
aroL|b0388|-53	site	TyrR	R	-328	-309	AGTGTAAATAATAAATTACA	9.5
cyaA|b3806|-153	site	TyrR	D	-296	-277	GTTGTAATAAGGAATTTACA	9.79
deaD|b3162|-114	site	TyrR	R	-288	-269	GCTGTATATATTATTTTACA	12.78
lysP|b2156|-27	site	TyrR	D	-156	-137	TGCGGATATAAAATTTAACA	10.16
metB|b3939|-37	site	TyrR	R	-247	-228	GACGTCAATACATCTGGACA	9.27
rplO|b3301|-100	site	TyrR	R	-530	-511	GCTGTAATCGCTGCTTTACG	10.41
yghB|b3009|-34	site	TyrR	D	-598	-579	TCTGGAAACGAGACTTTACA	9.86
yghZ|b3001|-35	site	TyrR	D	-114	-95	TGCGGAAAAAGTGGTTTACG	9.82
yjeS|b4166|-22	site	TyrR	D	-46	-27	TGTGGATAACTCTGTTTACA	9.22
tufA|b3339|-2	site	UlaR	D	-203	-180	AATTACACGTTAATTAGTTTTGAA	10.29
tufA|b3339|52	site	UlaR	D	-149	-126	AATTACACGTTAATTAGTTTTGAA	10.29
yccJ|b1003|-288	site	UlaR	R	-288	-265	AATCGCGATTTGATGAAAATTGAA	10.8
cca|b3056|-28	site	XylR	D	-446	-425	AAAAGAAGAAAATCAGAAACTG	12.43
gatD|b2091|-409	site	XylR	D	-571	-550	AAAACAGATCATTCACCAATGG	10.4
guaB|b2508|-17	site	XylR	D	-403	-382	GAAAGAGATCATTCACCAGCAG	10.37
lon|b0439|-76	site	XylR	R	-362	-341	GCTTGCCATAAATCAGCAACGG	11.8
recR|b0472|-31	site	XylR	D	-448	-427	GCAAGAAAAAATGCAGAAAATG	10.56
